1 **A pipeline for multidimensional confocal analysis of mitochondrial**  
2 **morphology, function and dynamics in pancreatic  $\beta$ -cells**

3

4 Ahsen Chaudhry<sup>1,2,\*</sup>, Rocky Shi<sup>1,2,\*</sup> and Dan S. Luciani<sup>1,2,#</sup>

5

6 <sup>1</sup>*Department of Surgery, University of British Columbia, Vancouver, BC, Canada*

7 <sup>2</sup>*BC Children's Hospital Research Institute, Diabetes Research Group, Vancouver, BC, Canada*

8

9 \*These authors contributed equally.

10

11 **#Corresponding Author:**

12 Dan S. Luciani, PhD

13 University of British Columbia

14 BC Children's Hospital Research Institute

15 A4-183, 950 W. 28<sup>th</sup> Avenue

16 Vancouver, BC, V5Z 4H4, Canada

17 Phone: (+1) 604-875-2000 ext. 6170

18 Fax: (+1) 604-875-2373

19 Email: [dluciani@bcchr.ca](mailto:dluciani@bcchr.ca)

20

21

22 **Key Words:** Cell metabolism; diabetes; fluorescence microscopy; image analysis; live-cell  
23 imaging

24

25 **Abbreviations:** AR, aspect ratio; FF, form factor; GTO, ground truth object; mito-PAGFP,  
26 mitochondria-targeted photoactivatable green fluorescent protein; mito-YFP, mitochondria-  
27 targeted yellow fluorescent protein; MTG, MitoTracker Green; TMRE, tetramethylrhodamine,  
28 ethyl ester; PSF, point-spread function; SPADE, Spanning-tree progression analysis of density-  
29 normalized events

30 **ABSTRACT**

31 Live-cell imaging of mitochondrial function and dynamics can provide vital insights into both  
32 physiology and pathophysiology, including of metabolic diseases like type 2 diabetes. However,  
33 without super-resolution microscopy and commercial analysis software it is challenging to  
34 accurately extract features from dense multi-layered mitochondrial networks, such as those in  
35 insulin-secreting pancreatic  $\beta$ -cells. Motivated by this, we developed a comprehensive pipeline,  
36 and associated ImageJ plugin, that enables 2D/3D quantification of mitochondrial network  
37 morphology and dynamics in mouse  $\beta$ -cells, and by extension other similarly challenging cell-  
38 types. The approach is based on standard confocal microscopy and shareware, making it widely  
39 accessible. The pipeline was validated using mitochondrial photo-labelling and unsupervised  
40 cluster analysis, and is capable of morphological and functional analyses on a per-organelle basis,  
41 including in 4D ( $xyzt$ ). Overall, this tool offers a powerful framework for multiplexed analysis of  
42 mitochondrial state/function, and provides a valuable resource to accelerate mitochondrial research  
43 in health and disease.

44

## 45 INTRODUCTION

46 Mitochondria are the main energy producing organelle of eukaryotic cells and are essential for a  
47 diverse range of cellular functions, including ATP synthesis, Ca<sup>2+</sup> homeostasis, ROS signaling,  
48 and the control of apoptotic cell death (1, 2). Microscopy has been instrumental in unraveling  
49 intricacies of mitochondrial biology and their diverse roles in cellular physiology and  
50 pathophysiology. Electron microscopy has provided fundamental insights into mitochondrial  
51 ultrastructure and cellular distribution in health and disease but requires cell fixation and only  
52 provides a static snapshot. In contrast, fluorescence microscopy of live cells, labeled with  
53 mitochondria-targeted fluorescent proteins or dyes, has revealed that mitochondria are highly  
54 dynamic and motile organelles that undergo frequent fusion and fission events (3-5).  
55 Mitochondrial dynamics and network morphology vary in different cellular states, and are  
56 important for the function and quality control of the organelle, as well as overall cell health and  
57 adaptation to stress (1). Healthy mitochondria are generally mobile, tubular in shape and exist in  
58 complex networks, whereas cells undergoing profound stress or entering apoptosis often display  
59 swollen and fragmented mitochondria, marked by concurrent disruption of metabolism, membrane  
60 potential, ROS levels, and Ca<sup>2+</sup> signalling (6-8). Quantitative imaging-based assessment of  
61 mitochondrial morphology and dynamics can therefore provide valuable insights into cellular  
62 physiology and pathophysiology.

63 In pancreatic  $\beta$ -cells, mitochondria play an essential role in insulin secretion, which relies  
64 on ATP and other mitochondria-derived metabolites to both trigger and amplify insulin granule  
65 exocytosis in response to glucose and other nutrient stimuli (9). Dysfunction of  $\beta$ -cell mitochondria  
66 therefore results in loss of glucose-stimulated insulin secretion (10). Perturbations to mitochondria  
67 are also a common feature in insulin target tissues with impaired insulin signaling (11, 12).  
68 Mitochondria thus take center stage in both  $\beta$ -cell failure and insulin resistance and are an area of  
69 significant focus in efforts to understand the pathophysiology of type 2 diabetes (13-15).  
70 Mitochondria also exist as dynamic networks in  $\beta$ -cells. Fusion within the network may help  
71 protect  $\beta$ -cells from nutrient stress-induced apoptosis (6), and mitochondrial fragmentation,  
72 swelling and dysfunction are seen in  $\beta$ -cells from patients with type 2 diabetes and rodent models  
73 of diabetes (15-18). Normal insulin secretion may also be influenced by  $\beta$ -cell mitochondrial  
74 dynamics (19-21), but exactly how networking of the organelle relates to its metabolic capacity in

75 healthy  $\beta$ -cells or during conditions of moderate nutrient excess remains unclear and warrants  
76 further investigation.

77 Most types of microscopy can detect the prominent morphological differences between  
78 healthy and severely stressed mitochondria with relative ease. It is, however, much more  
79 challenging to accurately quantify subtle changes in mitochondrial dynamics, or perform 3D  
80 analysis of the full mitochondrial network. This is particularly difficult in cells with a dense  
81 mitochondrial network that spans several layers, such as  $\beta$ -cells (6, 18). Although methods have  
82 been published that integrate 3D confocal imaging and analysis of mitochondria, these generally  
83 use commercial software packages and/or are optimized for relatively flat cell types (22, 23). This  
84 is likely one reason why there are only few quantitative analyses of  $\beta$ -cell mitochondrial dynamics,  
85 and why full 3D investigations of  $\beta$ -cell mitochondria are limited to a small number of examples  
86 using super-resolution approaches, such as  $4\pi$ -microscopy (18, 24).

87 To facilitate progress in the important area of mitochondrial biology and dynamics we  
88 present here a pipeline for quantitative multidimensional analysis of mitochondria that is based on  
89 standard confocal fluorescence microscopy and the open source image analysis platform  
90 ImageJ/Fiji (25, 26). In this, we identify a superior method for accurate identification of individual  
91 mitochondria within dense networks, and we outline a framework for quantitative description of  
92 mitochondrial morphology and network characteristics. Applying this pipeline to clonal MIN6  $\beta$ -  
93 cells and primary mouse  $\beta$ -cells, we quantitatively distinguish mitochondrial morphologies,  
94 including the functional and morphological changes to physiological and pathophysiological  
95 stimuli. Additionally, we discuss the pros and cons of 2D and 3D imaging approaches, identify  
96 image processing steps required for accurate mitochondrial analysis in 3D, and apply these to  
97 quantitate distinct 3D  $\beta$ -cell network morphologies. Finally, we extend our analysis to 4D by  
98 including time-lapse data, and we demonstrate the feasibility of using the pipeline to quantitate the  
99 dynamics of the entire three-dimensional mitochondrial network in live cells.

100

## 101 **RESULTS AND DISCUSSION**

### 102 *Overall workflow & general considerations*

103 Fluorescence confocal analysis of mitochondria in live cells involves several general steps, each  
104 of which is important for high-quality results (Figure 1). As a starting point, the cells must be  
105 cultured on glass coverslips, or other vessels, that are appropriate for confocal microscopy. The

106 mitochondria should then be labelled using carefully chosen mitochondria-targeted fluorescent  
107 proteins or organic dyes (27), and the image acquisition should be optimized and carried out in a  
108 manner that provides sufficiently high resolution and image quality for accurate analysis. Because  
109 these factors and general steps can vary between specific experiments and microscope systems, an  
110 extensive discussion falls beyond the scope of this paper. The imaging parameters and conditions  
111 we have used are detailed in Materials and Methods. Our focus in the following will be on the  
112 post-acquisition steps that are critical for accurate morphological analysis of mitochondria in the  
113 confocal images.

114 Image acquisition and analysis can be done in 2D or 3D, and by further extending this to  
115 include time-lapse capture, important information can be extracted about mitochondrial dynamics.  
116 The choice between these imaging modes may be influenced by several considerations, including  
117 the type and thickness of the cell, the specific parameters to be quantified, and the biological  
118 questions being asked. For instance, we will discuss later how some 2D analyses of relatively thick  
119 cells, such as pancreatic  $\beta$ -cells, can be associated with inaccuracies that may be mitigated by a  
120 full 3D analysis of the mitochondrial network. In all cases, accurate quantification of mitochondrial  
121 features involves image processing steps and identification of the mitochondrial objects in the  
122 image. Morphological features can then be extracted using appropriate 2D or 3D shape descriptors,  
123 while mitochondrial networking can be assessed through skeletonization analysis. In this latter  
124 process, the binarized mitochondria are converted into topological skeletons (the thinnest form  
125 that is equidistant to its edges) and the branches of the skeleton are analyzed. In the following, we  
126 describe each of these post-acquisition steps and identify a number of “best approaches”, to build  
127 a pipeline for accurate multidimensional analysis of mitochondria that we also implement and  
128 make available in a comprehensive Mitochondria Analyzer plugin for ImageJ/Fiji (28).

129

### 130 ***Image thresholding and identification of mitochondria***

131 Before accurate morphological analysis of fluorescently-labeled mitochondria can be done, it is  
132 essential that: i) the mitochondrial population is correctly identified in the images, and ii) the  
133 individual mitochondrial units can be distinguished within the dense mitochondrial network. For  
134 this critical step, a thresholding process based on analysis of the intensity histogram is used to  
135 distinguish pixels with “true” fluorescent signal from background signal. This process also groups  
136 any identified positive pixels that are connected into discrete objects (i.e. mitochondria) that can

137 be analyzed further. Thresholding approaches can be broadly categorized as either ‘Global’ or  
138 ‘Local’, which identify positive pixels based on the histogram of the entire image or on dynamic  
139 analyses of image sub-regions, respectively (22, 29). Global thresholding tends to be the most  
140 commonly used approach, but this may reflect its relative ease of use rather than accuracy.

141 To identify the most suitable thresholding strategy for mitochondrial identification, we  
142 compared the performance of the Global and Local threshold methods available for ImageJ/Fiji on  
143 images of primary islet cells stained with MitoTracker dye. This was judged on the ability to  
144 preserve mitochondrial structural detail while minimizing capture of background signal. For  
145 optimal results, all images were pre- and post-processed to reduce noise (see Materials &  
146 Methods). Among the Global-based algorithms in the ImageJ/Fiji “Auto Threshold” command,  
147 we qualitatively estimated that the Default method performs similar to, or in several cases better  
148 than, the other Global algorithms (Figure S1).

149 The Local thresholding methods we tested included the Mean, Median, and Mid-grey  
150 algorithms (part of the “Auto Local Threshold” command), as well as the Weighted Mean method  
151 (also called Adaptive threshold), which is available through a separate plugin (30) (Figure S2).  
152 These Local methods compute a threshold for each pixel in the image and require the definition of  
153 two parameters: a block size and a C-value. The block size specifies the size of the region around  
154 each pixel for which the histogram is analyzed and should be chosen based on the size of the  
155 objects of interest for the best results (30). The C-value provides an offset to the threshold and  
156 helps strike a balance between minimizing noise detection and incorrectly splitting objects into  
157 smaller pieces (30, 31). Using the Adaptive threshold method for optimization, we found that the  
158 ideal C-value depended on the image’s signal-to-noise contrast and needed to be empirically  
159 determined. For each set of images that has been acquired and processed in a similar manner, we  
160 therefore recommend that various combinations of block size and C-values should be tested on a  
161 representative image to determine the best combination. The optimized parameters can then be  
162 used to threshold all images in the group similarly (Figure S2, Supplemental Methods for details).  
163 Among the Local threshold approaches, our assessment was that the Mean and Adaptive threshold  
164 methods best captured mitochondrial structure, and that the Adaptive threshold further tended to  
165 identify less noise (Figure S2B).

166 A side-by-side comparison indicated that Local (Adaptive) thresholding resolves  
167 mitochondria better than Global thresholding, which appears to capture more out-of-focus signal

168 and/or noise, and therefore erroneously merges adjacent objects (Figures 2A & B). For a more  
169 stringent and quantitative evaluation, we used mitochondria-targeted photoactivatable GFP (mito-  
170 PAGFP) to selectively photo-label single mitochondria and identify truly contiguous organelles  
171 within dense regions of the network (4, 5). As exemplified in Figure 2B, and quantified in Figure  
172 2C (see also Figure S3), Adaptive thresholding was indeed better at delineating photo-labeled  
173 mitochondria, and distinguishing closely adjacent parts of the network that are physically separate.  
174 In contrast, the Global threshold algorithm consistently overestimated the mitochondrial size.  
175 Taken together, these comparisons established that using Adaptive thresholding, with empirically  
176 optimized parameter values, is a superior approach for accurate identification of fluorescently  
177 labeled  $\beta$ -cell mitochondria.

178

### 179 ***Two-dimensional analysis of mitochondrial morphology and network connectivity***

180 After careful image thresholding, the next step is to quantify the morphological features of the  
181 identified mitochondrial objects. We therefore identified a comprehensive set of parameters to  
182 capture and mathematically describe key aspects of the mitochondrial morphology. For 2D  
183 analysis, we characterize mitochondrial size by area and perimeter, while mitochondrial shape is  
184 defined by form factor (FF) and aspect ratio (AR). We evaluate the overall connectivity and  
185 morphological complexity of the mitochondrial network based on the skeletonized network, and  
186 quantify this by the number of branches, the number of branch junctions, as well as total  
187 (accumulated) length of branches in the skeleton. Figure 3 summarizes the various parameters and  
188 indicate how they change with various morphologies.

189 To evaluate the ability of this approach to measure and distinguish mitochondrial  
190 morphologies, we transfected MIN6 cells with mito-YFP and generated an image-set consisting  
191 of 2D slices from 84 cells. We then divided the cells into three different categories based on visual  
192 inspection of their mitochondria: 1) a “fragmented” group, characterized by small round  
193 mitochondria and little branching; 2) a “filamentous” group, with highly connected networks of  
194 long/filamentous mitochondria; and 3) an “intermediate” group of cells, containing a mixture of  
195 punctate and longer tubular mitochondria. As shown in Figure 4, analysis of the 2D images resulted  
196 in quantitative morphological and networking parameters that differed significantly between the  
197 three groups. Of note, a more in-depth comparison of the two shape descriptors revealed that FF  
198 required smaller sample sizes than AR to detect differences between the three morphological sub-

199 types, and seemed particularly well-suited for distinguishing between cells with filamentous and  
200 intermediate mitochondrial morphologies (Figure S4). Likely, this is because AR only measures  
201 elongation, whereas FF incorporates the perimeter and therefore is more sensitive to curvature and  
202 the irregular shapes of filamentous mitochondria (Figure S4B). Collectively, these results  
203 demonstrate that our combined approach for image processing, thresholding, and analysis enables  
204 quantitative identification and comparison of mitochondrial morphological sub-types.

205

### 206 ***Validation of morphometric quantifications and classifications by unsupervised clustering***

207 Next, we further tested our pipeline by using Spanning-tree Progression Analysis of Density-  
208 normalized Events (SPADE) (32, 33) to obtain an unbiased classification of our test images. The  
209 morphological parameters that had been calculated from our image set of 84 mito-YFP-expressing  
210 MIN6 cells (shown in Figure 4) were loaded into SPADE, which used these to generate a  
211 population tree in which each node represents a cell (Figure 5A). This SPADE tree was then  
212 subdivided into 3 cell populations based on automatic classification of their mitochondrial features  
213 (Figure 5A; see Materials and Methods for details). When images from each of the three SPADE-  
214 identified groups were subsequently examined, the mitochondria in each group were noticeably  
215 dissimilar in appearance (Figure 5B), and comparative analysis revealed that there were significant  
216 differences in all the morphological descriptors (Figure 5C & D). The morphometric data indicated  
217 that SPADE Subgroups 1, 2, and 3 corresponded to cells with filamentous, intermediate, and  
218 fragmented mitochondria, respectively. This was confirmed by an 88% match between the  
219 unsupervised SPADE clustering and our manual grouping of the cells. Together, these results  
220 provide an unbiased validation of the applicability and robustness of our 2D pipeline for analysis  
221 of mitochondrial network structure and complexity.

222

### 223 ***Limitations of 2D mitochondrial analysis***

224 Our 2D analyses reliably measure mitochondrial morphology in an optical cross-section and can  
225 provide valuable information regarding the state of the organelle. However, when cells are  
226 relatively thick and tend to have a mitochondrial network that spans several layers, this approach  
227 has its challenges and limitations. It is difficult to know if a given plane in a cell is truly  
228 representative, and as illustrated by the green objects in Figure 6A the 2D appearance of a  
229 mitochondrion will also depend on its orientation relative to the optical cross-section. Moreover,



230 a 2D image is unlikely to reveal the actual interconnectedness of the mitochondrial network. When  
231 a mitochondrion spans multiple planes and intersects the focal cross-section at several points, it  
232 can result in a notable misrepresentation of the morphology, as illustrated by the blue schematic  
233 object in Figure 6A. That this also occurs in situ is demonstrated in the side-by-side 2D and 3D  
234 visualization of a photo-labeled mitochondrion in Figure 6B & C. When viewed in 2D, the  
235 localized photo-activation of mito-PAGFP seemed to label four small and distinct mitochondria  
236 (Figure 6B; shown in green), but a full 3D reconstruction revealed that it was in fact one continuous  
237 organelle (Figure 6C), consistent with diffusion-mediated distribution of GFP within the lumen.

238 Another inherent limitation of 2D analysis is that it does not allow direct quantitation of  
239 the total mitochondrial mass. Cross-sectional area has been used to estimate mass in relatively flat  
240 cells like neurons and fibroblasts where mitochondria are confined to a limited number of planes  
241 (22, 34). However, this approximation is less appropriate for thicker cells, including  $\beta$ -cells. A  
242 common alternative, intended to capture as much of the mitochondrial network as possible,  
243 involves acquiring a stack of z-slices and projecting these into a single plane for faster and simpler  
244 analysis (6, 23). Such projections contain information from the whole network, but in voluminous  
245 cells this will erroneously merge overlapping mitochondria and produce indiscriminate clusters in  
246 the resulting image.

247 As the importance of mitochondrial dynamics and its implication for cellular health and  
248 disease has become more apparent, there is also an increasing need for more comprehensive  
249 characterization of the organelle. Accordingly, there will inevitably be instances where the caveats  
250 of 2D analysis we discussed above become restricting. To enable more precise quantification of  
251 mitochondrial volume and network structure we therefore expanded our pipeline to include a  
252 complete 3D representation and analysis.

253

### 254 ***Three-dimensional imaging and analysis of mitochondria***

255 Full 3D reconstruction of mitochondria can be accomplished by taking a stack of serial slices  
256 throughout the volume of the cell and integrating them with software such as ImageJ/Fiji.  
257 However, there are technical challenges and constraints specifically associated with 3D imaging.  
258 Foremost of these is that the maximum axial resolution (z-axis) of confocal microscopes is  
259 approximately 500-800 nm, which is almost three times worse than the lateral (*xy*-plane) (35, 36).  
260 As mitochondria are often less than 1 micron in diameter they approach this limit (18). This can

261 lead to a distorted appearance of imaged mitochondria, particularly in the z-axis where it causes  
262 artificial stretching and blending of signal from objects in close vertical proximity to each other.  
263 In the following section we discuss steps that can be taken to mitigate some of these caveats and  
264 improve 3D results.

265

### 266 *Image acquisition and processing requirements for accurate 3D analysis*

267 An important first consideration when acquiring a stack of images for 3D analysis is the z-distance  
268 between adjacent imaging planes. If the spacing is too large the final reconstruction will be  
269 inaccurate. On the other hand, over-sampling will take unnecessary time, increase photo-toxicity,  
270 and require additional resources for image storage and analysis. The distance between serial  
271 sections should therefore be set according to the optimal Nyquist sampling rate, which provides  
272 the ideal density of information to permit accurate digital reconstruction of an object (37). The  
273 Nyquist distance can be calculated using online resources (38).

274 Even under optimal conditions, a confocal image will be affected by inherent diffraction-  
275 induced distortion of the imaged object. This distortion can be represented by a point-spread  
276 function (PSF) and then computationally corrected by using deconvolution algorithms. By  
277 removing the effects of the PSF, the deconvolution process provides a more correct representation  
278 of the underlying object and also helps eliminate out-of-focus light and/or noise in the image (36).  
279 In Figure 7 we illustrate this and use the free DeconvolutionLab2 module for ImageJ/Fiji and the  
280 commercial deconvolution software, Huygens Professional (SVI), to test the effect of  
281 deconvolution on 3D-stacks of mitochondria (see Materials and Methods for details). As seen in  
282 Figure 7A, mitochondria in the raw image stack have approximately 2-3x greater diameter in the  
283  $xz$ -view than in the  $xy$ -view, which illustrates the z-stretching. The deconvolution algorithms help  
284 reduce this distortion, remove noise, and improve the contrast and separation of adjacent objects  
285 (Figure 7A and Figure S5). In general, we found that the Huygens deconvolution package reduced  
286 axial stretching more effectively than the ImageJ DeconvolutionLab2 module. By and large,  
287 however, both deconvolution algorithms significantly increased the quality of 3D mitochondrial  
288 network reconstructions compared to the raw confocal images (Figure 7B). Deconvolution also  
289 affected subsequent 3D quantifications of mitochondrial number, shape, and size in a way that  
290 indicated superior separation of individual mitochondria within the full population (Supplemental  
291 Table 1; see discussion of the 3D analysis parameters below). In summary, these results

292 demonstrate that deconvolution of the raw confocal image stacks helps mitigate limitations of 3D  
293 imaging and is a necessary step for accurate reconstruction and quantification of the full  
294 mitochondrial network.

295

### 296 ***Three-dimensional quantification of mitochondrial morphology and network connectivity***

297 When a high-quality representation of the full mitochondrial network has been generated,  
298 ImageJ/Fiji can be used to extract information about the 3D morphology and connectivity by the  
299 same general principles previously discussed for 2D. Mitochondrial size in 3D is represented by  
300 volume and surface area, while shape is characterized by the sphericity of the mitochondrial object.  
301 The complexity of the 3D network is quantified by the same branch parameters used for 2D (see  
302 Figure 3 for a summary). Analogous to our 2D analyses, we evaluated our 3D approach by  
303 generating a set of image stacks from mito-YFP-expressing MIN6 cells, and grouping these as  
304 fragmented, filamentous, or intermediate based on the visual appearance of the reconstructed  
305 mitochondrial networks (Figure 8A). Quantification using ImageJ/Fiji (See Figure 9 and Materials  
306 & Methods for details) showed that the number of mitochondria per cell and their average  
307 sphericity progressively increased, while the average mitochondrial volume decreased, as we move  
308 from filamentous to intermediate to fragmented morphologies (Figure 8B). In contrast, the total  
309 mitochondrial volume of each cell remained constant, highlighting that significant morphological  
310 heterogeneity can occur independent of changes to mitochondrial mass (Figure 8B). In the  
311 skeletonized network the number of branches and branch junctions progressively decreased,  
312 illustrating that mitochondrial fragmentation, not surprisingly, is associated with a reduction in  
313 overall network complexity (Figure 8C & D). Together, the above results and discussions  
314 demonstrate how standard confocal imaging can be combined with ImageJ/Fiji-based processing  
315 and analysis, to quantify volume, morphology, and connectivity of the entire mitochondrial  
316 network in pancreatic  $\beta$ -cells. To our knowledge, full 3D characterization of live  $\beta$ -cell  
317 mitochondria has previously only been done at this level using specialized super-resolution  
318 imaging techniques (18, 24).

319

### 320 ***Pipeline Summary***

321 Figure 9 illustrates the overall pipeline for 2D and 3D mitochondrial analysis. In summary, 2D  
322 image slices or 3D image stacks are first acquired, and the latter deconvolved prior to analysis. In

323 ImageJ/Fiji, deconvolution of 3D stacks is done using the DeconvolutionLab2 module (39) and if  
324 desired, the 3D stack can be visualized using the “3D Viewer” or “Volume Viewer” functions.  
325 Alternatively, 3D deconvolution and visualization can be done using commercial software, such  
326 as Huygens, if available to the user (Figure 7). For analysis, all images are then pre-processed  
327 using the commands: “Subtract Background”, “Sigma Filter Plus”, “Enhance Local Contrast”, and  
328 “Gamma Correction”. We then empirically test a range of block sizes and C-values for the  
329 “Adaptive Threshold” command to establish the optimal values and use these as input when  
330 applying the threshold algorithm. The resulting binarized images are post-processed using the  
331 “Despeckle”, “Remove Outliers”, and “Fill 3D Holes” commands. At this stage, we recommend  
332 comparing the final thresholded image to the original images as a quality control check of the  
333 object identification and segmentation. The identified mitochondrial objects are then analyzed in  
334 2D using “Analyze Particles”, which provides mitochondrial count, area, perimeter, form factor  
335 (FF), and aspect ratio (AR). For 3D analysis, we use the “3D Object Counter” and “3D Particle  
336 Analyzer” (from the MorphoLibJ package) commands to quantify count, volume, surface area,  
337 and sphericity. The thresholded objects are then converted into skeletons using “Skeletonize  
338 (2D/3D)”, and we apply the “Analyze Skeleton” command to obtain the number of skeletons,  
339 number of branches, length of branches, and number of branch junctions in the 2D or 3D network.  
340 Additional details and parameter values can be found in Materials and Methods.

341

### 342 *Quantifying physiological and pathophysiological changes to mitochondrial morphology and* 343 *networking*

344 Having established and validated the mitochondrial analysis pipeline, we next used it to  
345 characterize mitochondrial changes under relevant physiological and pathophysiological  
346 conditions. As a test of acute functional responses, primary mouse  $\beta$ -cells were cultured in either  
347 basal (3 mM) or stimulatory (17 mM) glucose for 1 hour and co-stained with MitoTracker green  
348 (MTG) and the mitochondrial membrane potential-sensitive dye TMRE (Figure 10A). The MTG  
349 fluorescence is insensitive to changes in mitochondrial polarization and served as the signal for  
350 mitochondrial detection and morphological characterization (40). The TMRE intensity provided a  
351 simultaneous readout of the activity of the individual mitochondrial units, and as expected  
352 stimulatory glucose increases the TMRE/MTG intensity ratio (Figure 10B). By visual inspection  
353 there were no obvious differences in mitochondrial morphology between the cells in low and high

354 glucose (Figure 10A), but quantitative analysis revealed a number of significant effects (Figure  
355 10C & D). Despite no change to total mitochondrial area, glucose stimulation increased the number  
356 of mitochondria, reduced their average size (area and perimeter) and made them more round  
357 (decreased form factor); all of which suggests increased mitochondrial fission (Figure 10C). This  
358 was further supported by skeletonization analysis, which showed that stimulatory glucose caused  
359 an overall reduction in mitochondrial network connectivity (decreased branch parameters) (Figure  
360 10D). This experiment agrees with previous reports linking drp1-dependent mitochondrial fission  
361 to glucose-stimulated insulin secretion (19, 20), and demonstrates that our analysis pipeline is  
362 sensitive enough to allow quantitative detection of subtle physiological changes to mitochondrial  
363 morphology and networking.

364 As an example of a full 3D application, we quantified the mitochondrial changes in  
365 palmitate-treated MIN6 cells; an *in vitro* model of the  $\beta$ -cell lipotoxicity associated with obesity  
366 and type 2 diabetes. As expected from previous 2D analyses (6) we observed a fragmentation of  
367 the mitochondrial network following treatment with a high concentration of palmitate (Figure S6).  
368 This pathophysiological stress response did not affect total mitochondrial volume but was clearly  
369 reflected in all parameters describing the 3D shape and size of individual mitochondrial units  
370 (Figure S6). Comparing the 2D morphological changes associated with 1 hour of glucose  
371 stimulation and 6 hours of palmitate exposure, it is interesting to note that palmitate treatment  
372 reduced AR by 26% and FF by 29%, while glucose stimulation only decreased AR and FF by 4%  
373 and 12%, respectively. This suggests that physiological fission generates daughter mitochondria  
374 that largely retain their shape, in contrast to the more pronounced stress-induced fragmentation,  
375 which also causes a striking rounding of the smaller organelles.

376

#### 377 ***Four-dimensional analysis of mitochondrial dynamics***

378 At any given time, the overall structure of a mitochondrial network reflects the net balance of  
379 fusion and fission between individual mitochondria. These are dynamic, energy-dependent,  
380 processes that involve mitochondrial movement, and coordinated actions of proteins that mediate  
381 fusion of the outer and inner membranes, or constriction and splitting of the organelle (2). Based  
382 on static image analysis alone it can be difficult to know the reason for a change in morphometry.  
383 For instance, a more connected and elongated network can be the result of an increase in fusion  
384 events, a decrease in fission activity, or a combination of both. To further understand the

385 underlying changes, it can therefore be valuable to monitor mitochondrial movement,  
386 morphological changes, and organelle interactions in real-time. In practical terms, this requires  
387 that image acquisition can be repeated at sufficiently frequent intervals, and that the analysis is  
388 extended to the time-domain. Previous studies have applied these principles to 2D images to  
389 provide important insights regarding mitochondrial dynamics and turnover in pancreatic  $\beta$ -cells  
390 (3, 6).

391 Here, we tested the feasibility of recording and quantifying the time-dependent dynamics  
392 of the full 3D mitochondrial network (i.e. an extension to 4D analysis). For this, we expressed  
393 mito-YFP in MIN6 cells and imaged these in a stage-top incubator on the confocal microscope.  
394 3D time-lapse data were generated by acquiring z-stacks of the cells at regular time-intervals  
395 (every 45 s) for a period of 30 minutes. At the 13-minute mark, we added a high concentration of  
396 the mitochondrial uncoupling agent, FCCP, with the purpose of inducing a relatively rapid change  
397 in mitochondrial dynamics and architecture. As seen in Figure 11 and Supplemental Video 1, the  
398 FCCP triggered a rapid, and dramatic, loss of mitochondrial connectivity along with an increase  
399 in the number of organelles. Interestingly, there was also a transient decrease in both average and  
400 total mitochondrial volume, which indicates an initial contraction and shrinking of the  
401 mitochondrial fragments followed by significant swelling; a known response to stress and osmotic  
402 shock (41). The abrupt and severe deterioration of the mitochondrial network likely reflects the  
403 induction of apoptosis due to profound damage from high levels of FCCP.

404 With this proof-of-principle experiment we have established the feasibility of analyzing  
405 the temporal dynamics of a full mitochondrial network using standard confocal microscopy. A  
406 powerful next step could be to combine this 4D approach with other tools such as photo-labeling  
407 and tracking of individual organelles, to generate even more complete and in-depth knowledge of  
408 the events that shape the mitochondrial network in health and disease.

409

## 410 **CONCLUSION & PERSPECTIVES**

411 Most aspects of cellular function and survival are linked to mitochondrial physiology or signals  
412 originating from the organelle, and in these contexts the importance of mitochondrial morphology  
413 and dynamics has become evident (1, 2). The integrity of the organelle itself, and by extension the  
414 metabolic health of the cell, depends on the capacity for mitochondrial adaptation to stress and on  
415 selective turnover of damaged parts of the network by mitophagy (3). These processes rely on

416 mitochondrial fusion and fission dynamics, which require sensitive live-cell imaging approaches  
417 to study (42). Our current understanding of mitochondrial dynamics in pancreatic  $\beta$ -cells has also  
418 been based largely on such imaging approaches (3, 6). However, it is challenging to accurately  
419 quantify  $\beta$ -cell mitochondrial morphometry and dynamics by fluorescence microscopy, and many  
420 important questions remain unanswered.

421 In the previous sections, we established a comprehensive set of methods for quantitative  
422 image analysis and ‘morphofunctional’ characterization of mitochondria based on standard  
423 confocal microscopy and the ImageJ/Fiji shareware. The robustness of these approaches was  
424 validated in several ways, including by unsupervised data clustering. We demonstrated the  
425 applicability of the resulting pipeline for cells with dense multi-layered mitochondria by  
426 conducting detailed 2D and 3D morphometric analyses of  $\beta$ -cells, and further extended these to  
427 4D time-lapse imaging with the accuracy needed for quantitative assessment of network dynamics.  
428 To help researchers implement these methods, we have also built our analysis pipeline into a plugin  
429 for ImageJ/Fiji called Mitochondria Analyzer. The plugin is publicly available (28) and includes  
430 a graphical user interface to facilitate pre-processing, parameter optimization, image thresholding  
431 and automated morphofunctional analysis of mitochondrial images or image stacks, according to  
432 the work-flow we have presented (Figure 9).

433 When testing the pipeline, we demonstrated the capability for multi-parameter  
434 characterization by performing 2D analyses of  $\beta$ -cells co-stained with MTG and TMRE for  
435 simultaneous recordings of changes to mitochondrial morphology and membrane potential.  
436 However, the pipeline can in principle be applied to any number of mitochondrial parameters,  
437 provided they can be jointly imaged and then quantified using shape- and intensity-based  
438 descriptors. We therefore predict that the same type of analysis using a stable mitochondrial label  
439 combined with one or more spectrally distinct fluorescent biosensors, e.g. for mitochondrial redox  
440 state, matrix  $\text{Ca}^{2+}$  or pH, could provide valuable insights into physiological and pathophysiological  
441 structure-function relationships in mitochondria. Importantly, the analysis pipeline treats all  
442 identified objects separately, and can therefore extract the morphological and functional  
443 descriptors on a per-mitochondria basis. In the previous sections we presented our results based  
444 on the cellular averages, but the same data-sets contain the descriptors associated with thousands  
445 of individual mitochondria and can be mined for a wealth of information about morphometry-  
446 physiology correlations and heterogeneity at the organelle level (43, 44). It should also be

447 emphasized that the practical considerations and best-practices we have discussed, and  
448 incorporated into our pipeline, are not restricted to  $\beta$ -cell analyses, but can also be applied to other  
449 cell types.

450 Finally, the pipeline can in principle also be used to investigate fluorescently labelled  
451 organelles other than mitochondria, provided that appropriate thresholding/analysis parameter  
452 adjustments can be made. The importance of inter-organelle contacts for cellular function and  
453 health are becoming clear, as is the highly complex and dynamic nature of the “organelle  
454 interactome” (45-47). Within the technical boundaries associated with standard confocal  
455 microscopy, the analysis approaches we have described here can help most research laboratories  
456 achieve the level of accuracy needed to explore internal mitochondrial network interactions, and  
457 likely also the mitochondrial relationship with other organelles, as we work to clarify the sub-  
458 cellular basis of diabetes and other diseases.

459

## 460 **MATERIALS AND METHODS**

### 461 *Reagents*

462 Collagenase type XI (#C7657), Tetramethylrhodamine Ethyl Ester (TMRE, #87917), D-glucose  
463 (#G7528), Bovine Serum Albumin (BSA, #A7030), FCCP (#C2920) and palmitic acid (#P5585)  
464 were purchased from Sigma-Aldrich (St. Louis, Missouri). MitoTracker Deep Red FM  
465 (#M224726), MitoTracker Green FM (MTG, #M7514), Hoechst 33342 (#H3570), RPMI 1640  
466 (#11879), Dulbecco’s Modified Eagle’s Medium (DMEM, #11995), Fetal Bovine Serum (FBS,  
467 #10438), Trypsin-EDTA (#25300), Penicillin-Streptomycin 10,000 U/mL (#15140), and HBSS  
468 (#14185) were purchased from Life Technologies/Thermo Fisher Scientific (Carlsbad, California).  
469 Dimethyl sulfoxide (DMSO, #BP231) was purchased from Fisher Scientific (Waltham,  
470 Massachusetts). Minimum Essential Media (MEM, #15-015-CV) was purchased from Corning  
471 (Corning, New York). The mitochondria-targeted YFP (mito-YFP) and mitochondria-targeted  
472 photoactivatable GFP (mito-PAGFP) plasmids were gifts from Dr. Mark Cookson (48) and Dr.  
473 Richard Youle (Addgene #23348) (5), respectively.

474

### 475 *Cell Isolation and Culture*

476 MIN6 cells were cultured at 37°C and 5% CO<sub>2</sub> using complete DMEM supplemented with 10%  
477 FBS and 2% Penicillin-Streptomycin. Culture media was replaced every 2 days and cells were



478 passaged upon reaching 70-80% confluency. To assess the effects of palmitate on mitochondrial  
479 networks, cells were cultured for 6 hours in complete DMEM supplemented with either 1.5 mM  
480 palmitate complexed to BSA in a 6:1 ratio, or BSA-only vehicle control.

481 Pancreatic islets were isolated from wild-type male mice of a mixed C57BL/6 and CD1  
482 background using collagenase digestion and filtration-based purification, as previously described  
483 (49). The isolated islets were hand-picked and allowed to recover overnight before being dispersed  
484 into single cells and seeded on 25 mm glass coverslips (50). The islet cells were cultured in RPMI  
485 completed with 10% FBS and 2% Penicillin-Streptomycin at 37°C and 5% CO<sub>2</sub> for 4 days before  
486 imaging. All animal procedures were approved by the University of British Columbia Animal Care  
487 Committee.

488

#### 489 ***Cell Transfection and Mitochondrial Labeling***

490 MIN6 cells were seeded at a density of  $2.0 \times 10^5$  on 25 mm glass coverslips (0.13-0.16 mm  
491 thickness, VWR #16004-310) and incubated for 24 hours before being transfected with mito-YFP,  
492 mito-dsRed, or mito-PAGFP plasmids using Lipofectamine® 2000 (Life Technologies #11668),  
493 as per the manufacturer's protocol. All plasmids were expressed for at least 24 hours before  
494 confocal microscopy.

495 To assess the effect of acute glucose exposure on mitochondrial morphology and  
496 membrane potential, primary mouse islet cells were cultured for 60 minutes in completed RPMI  
497 media containing 3 mM glucose or 17 mM glucose and then stained with 0.1 µg/mL Hoescht  
498 33342, 50 nM MTG, and 25 nM TMRE for 30 min, followed by a wash with completed RPMI  
499 immediately prior to imaging.

500

#### 501 ***Image Acquisition by Confocal Microscopy***

502 Live cells were imaged in a Tokai Hit INUBTFP-WSKM stage-top incubator at 37°C on a Leica  
503 SP8 Laser Scanning Confocal Microscope (Concord, Ontario, Canada). For 2D, images were  
504 acquired using a 63x HC Plan Apochromatic water immersion objective (1.2 NA). Pixel size was  
505 adjusted using the "Optimize" function in the Leica LASX Software and the pinhole size was 1.0  
506 AU. For 3D acquisition, z-stacks were obtained using a 63x oil immersion objective (1.4 NA).  
507 Pixel size (x, y) and z-spacing were adjusted as per the calculated optimal Nyquist sampling  
508 parameters (38), and pinhole size was reduced to 0.75 AU. The z-step size generally varied

509 between 170-220 nm. Bi-directional scanning was enabled, and all images were acquired using at  
510 least three frame averages. Laser power, detector filtering/gating, and gain were adjusted to  
511 maximize signal without saturation, while also minimizing background signal, cross-fluorescence,  
512 and photobleaching.

513

### 514 ***Time-Lapse 3D Imaging***

515 Time-lapse 3D (*xyz**t*) imaging was performed on MIN6 cells transfected with mito-YFP plasmid.  
516 Acquisition settings were established as above, and *z*-stacks were acquired every 45 s for 30 min.  
517 The acquisition time for each stack was approximately 30 s. At the 13 min-mark, FCCP was added  
518 to the chamber for a final concentration of 25  $\mu$ M.

519

### 520 ***Mitochondrial labeling by Photoactivatable Green Fluorescent Protein***

521 MIN6 cells were co-transfected with mito-PAGFP and mito-dsRed 24 hours prior to imaging, as  
522 described above. Mito-dsRed was visualized using a 561 nm excitation laser with emission  
523 detected between 585 nm to 650 nm. Individual mitochondria were marked for photo-labeling  
524 using the “Bleach Point” function in the Leica LasX software, and the PAGFP was activated using  
525 a 405 nm laser pulse of 150 ms duration. The activated PAGFP was then imaged using a 488 nm  
526 excitation laser with an emission range between 505 nm and 550 nm. All other imaging settings  
527 were as described above.

528

### 529 ***Image Deconvolution***

530 Deconvolution of 3D and 4D stacks was performed in Huygens Professional version 16.10 (SVI)  
531 using the CMLE (Classic Maximum Likelihood Estimation) algorithm with a Signal-to-Noise  
532 Ratio of 7.0, maximum iterations of 40, and quality threshold of 0.001. For deconvolution in  
533 ImageJ/Fiji, the “PSF Generator” plugin (51) was used to generate a theoretical PSF based on our  
534 microscope parameters, and deconvolution was performed with the “DeconvolutionLab2” module  
535 utilizing the Richardson-Lucy TV algorithm with regularization set to 0.0001 and maximum  
536 iterations of 30 (39, 52).

537

538

539

## 540 ***Image Processing and Thresholding***

541 The workflow and procedures for image processing and thresholding are summarized in Figure 9.  
542 Using ImageJ/Fiji, 2D images or deconvolved 3D image stacks (operating on each slice in the  
543 stack) were pre-processed using the following commands: 1) “Subtract Background” (radius =  
544  $1\mu\text{m}$ ) to remove background noise; 2) “Sigma Filter Plus” (radius =  $0.1\mu\text{m}$ , 2.0 sigma) to reduce  
545 noise and smooth object signal while preserving edges; 3) “Enhance Local Contrast” (block size  
546 = 64, slope = 2.0 for 2D and 1.25 for 3D stacks) to enhance dim areas while minimizing noise  
547 amplification; and 4) “Gamma Correction” (value = 0.80 for 2D and 0.90 for 3D) (29) to correct  
548 any remaining dim areas. To identify mitochondria in the images, we evaluated multiple global  
549 and local thresholding algorithms (Figure 2 and Figures S1-S3). Based on our comparisons, we  
550 elected to use the “Adaptive Threshold” method (30). In the “Adaptive Threshold” plugin, block  
551 size was set to an equivalent of  $1.25\mu\text{m}$  and the optimal C-value was empirically determined for  
552 each image set (See Figure S2 for additional details). The thresholded images were then post-  
553 processed using “Despeckle” and then “Remove Outliers” (radius =  $0.15\mu\text{m}^2$ ) to remove residual  
554 noise. For 3D stacks we additionally applied the “Fill 3D Holes” command from the “3D ROI  
555 Manager” plugin (53).

556

## 557 ***2D Analysis of Mitochondrial Function, Morphology, and Network Characteristics***

558 The approach for quantification of mitochondrial characteristics is summarized in Figure 9. For  
559 2D analysis, the image was first processed and thresholded (see above) and the resulting binary  
560 image was used as the input for the “Analyze Particles” command (Size =  $0.06\mu\text{m}^2$ -Infinity,  
561 Circularity = 0.00-1.00), measuring for “Area”, “Perimeter”, and “Shape Descriptors”. Form  
562 Factor (FF) was derived as the inverse of the “Circularity” output value. For network connectivity  
563 analysis, the “Skeletonize 2D/3D” command was applied to the thresholded image to produce a  
564 skeleton map, and the “Analyze Skeleton” command was used to calculate the number of branches,  
565 branch lengths, and branch junctions in the skeletonized network.

566 To simultaneously measure mitochondrial polarisation and morphology, islet cells were  
567 co-stained with MTG and TMRE. Our threshold method was first applied to the MTG channel and  
568 morphological analysis was done on the identified objects. Additionally, the “Analyze Particles”  
569 command (“Add to Manager” option enabled) was used to convert the identified objects  
570 (mitochondria) into regions of interest (ROIs). These ROIs were then superimposed onto the raw

571 images of the MTG and TMRE channels, and the MTG and TMRE intensities of each individual  
572 mitochondrion were measured as the “Mean gray value” obtained via the “Analyze Particles”  
573 command. The degree of mitochondrion polarisation was then expressed as the ratio of TMRE to  
574 MTG intensity and correlated with mitochondrial morphology on a per-organelle basis.

575

### 576 *3D Analysis of Mitochondrial Morphology and Network Characteristics*

577 For 3D analysis, the image stacks were first deconvolved, pre-processed, and thresholded as  
578 described above and summarized in Figure 9. Next, the “3D Object Counter” command (Size =  
579  $0.6 \mu\text{m}^3$ -Infinity) was used to calculate the number of mitochondrial objects and produce a labelled  
580 object map. The object map was subsequently used as an input for the “Particle Analyzer 3D”  
581 command (part of the MorphoLibJ package) (54) to calculate the volume, sphericity (weighted by  
582 volume of the object), and corrected surface area (“Crofton 13 directions” method) of each  
583 mitochondrial object. Network connectivity analysis was performed on the skeletonized 3D  
584 network using the same commands as 2D analysis. For 4D ( $xyzt$ ) analysis, these 3D analysis steps  
585 were performed on each stack obtained in the time-course acquisition.

586

### 587 *Unsupervised Categorization of Mitochondrial Morphology using SPADE*

588 Spanning-tree Progression Analysis of Density-normalized Events (SPADE v3.0) (32, 33) was  
589 used to automatically classify 2D mitochondrial images into 3 different categories based  
590 exclusively on their calculated morphological and network parameters. Briefly, mitochondrial  
591 parameter data was transformed into a Flow Cytometry Standard (FCS) file using FlowJo V10 and  
592 loaded into SPADE. A SPADE tree was created using default settings, without application of  
593 arcsinh transformation or removal of outliers. The number of desired clusters was set equal to the  
594 total number of images in the data set. The “Auto Suggest Annotation” function was then used to  
595 partition the SPADE tree into 2 subgroups and the larger of these was subsequently auto-  
596 partitioned again, resulting in a total of 3 subgroups. The data in these SPADE-identified groups  
597 were then exported as CSV formatted files for statistical comparison.

598

### 599 *Statistical analysis*

600 All data were represented as mean  $\pm$  standard error of the mean (SEM). Data were analyzed in  
601 GraphPad Prism 6.0 software (La Jolla, California) using Student’s t-test or One-way ANOVA,

602 followed by Sidak multiple comparison test as appropriate. Statistical significance was set at a  
603 threshold of  $p < 0.05$ .

604

## 605 **ACKNOWLEDGEMENTS**

606 We thank Dr. Jingsong Wang, Mei Tang, and Mitsuhiro Komba at BC Children's Hospital  
607 Research Institute (BCCHRI) for technical assistance and Daniel J. Pasula for constructive  
608 feedback and discussion. This work was supported by operating funds from the Canadian Institutes  
609 of Health Research (CIHR; MOP-119537) and JDRF (2-2013-50). Research infrastructure was  
610 funded by the Canadian Foundation for Innovation (CFI; #30214). DSL received salary support  
611 from BCCHRI and Diabetes Canada. RS was supported by a Canada Graduate Scholarship from  
612 CIHR.

613

## 614 **AUTHOR CONTRIBUTIONS**

615 AC, RS and DSL all contributed to the design of methods and validations. AC and RS performed  
616 the experiments and validations. AC, RS and DSL all analyzed/interpreted the data and wrote the  
617 paper. AC developed the associated Mitochondria Analyzer plugin for ImageJ.

618

## 619 **COMPETING INTERESTS**

620 None of the authors have competing interests to declare.

621

## 622 **REFERENCES**

- 623 1. Eisner V, Picard M, Hajnoczky G. Mitochondrial dynamics in adaptive and maladaptive  
624 cellular stress responses. *Nat Cell Biol.* 2018;20(7):755-65.
- 625 2. Pernas L, Scorrano L. Mito-Morphosis: Mitochondrial Fusion, Fission, and Cristae  
626 Remodeling as Key Mediators of Cellular Function. *Annu Rev Physiol.* 2016;78:505-31.
- 627 3. Twig G, Elorza A, Molina AJ, Mohamed H, Wikstrom JD, Walzer G, et al. Fission and  
628 selective fusion govern mitochondrial segregation and elimination by autophagy. *EMBO J.*  
629 2008;27(2):433-46.
- 630 4. Twig G, Graf SA, Wikstrom JD, Mohamed H, Haigh SE, Elorza A, et al. Tagging and  
631 tracking individual networks within a complex mitochondrial web with photoactivatable GFP. *Am*  
632 *J Physiol Cell Physiol.* 2006;291(1):C176-84.

- 633 5. Karbowski M, Arnoult D, Chen H, Chan DC, Smith CL, Youle RJ. Quantitation of  
634 mitochondrial dynamics by photolabeling of individual organelles shows that mitochondrial fusion  
635 is blocked during the Bax activation phase of apoptosis. *J Cell Biol.* 2004;164(4):493-9.
- 636 6. Molina AJ, Wikstrom JD, Stiles L, Las G, Mohamed H, Elorza A, et al. Mitochondrial  
637 networking protects beta-cells from nutrient-induced apoptosis. *Diabetes.* 2009;58(10):2303-15.
- 638 7. Arnoult D. Mitochondrial fragmentation in apoptosis. *Trends Cell Biol.* 2007;17(1):6-12.
- 639 8. Brookes PS, Yoon Y, Robotham JL, Anders MW, Sheu SS. Calcium, ATP, and ROS: a  
640 mitochondrial love-hate triangle. *Am J Physiol Cell Physiol.* 2004;287(4):C817-33.
- 641 9. Prentki M, Matschinsky FM, Madiraju SR. Metabolic signaling in fuel-induced insulin  
642 secretion. *Cell Metab.* 2013;18(2):162-85.
- 643 10. Silva JP, Kohler M, Graff C, Oldfors A, Magnuson MA, Berggren PO, et al. Impaired  
644 insulin secretion and beta-cell loss in tissue-specific knockout mice with mitochondrial diabetes.  
645 *Nat Genet.* 2000;26(3):336-40.
- 646 11. Jheng HF, Tsai PJ, Guo SM, Kuo LH, Chang CS, Su IJ, et al. Mitochondrial fission  
647 contributes to mitochondrial dysfunction and insulin resistance in skeletal muscle. *Mol Cell Biol.*  
648 2012;32(2):309-19.
- 649 12. Samuel VT, Shulman GI. The pathogenesis of insulin resistance: integrating signaling  
650 pathways and substrate flux. *J Clin Invest.* 2016;126(1):12-22.
- 651 13. Fex M, Nicholas LM, Vishnu N, Medina A, Sharoyko VV, Nicholls DG, et al. The  
652 pathogenetic role of beta-cell mitochondria in type 2 diabetes. *J Endocrinol.* 2018;236(3):R145-  
653 R59.
- 654 14. Sharoyko VV, Abels M, Sun J, Nicholas LM, Mollet IG, Stamenkovic JA, et al. Loss of  
655 TFB1M results in mitochondrial dysfunction that leads to impaired insulin secretion and diabetes.  
656 *Human molecular genetics.* 2014;23(21):5733-49.
- 657 15. Haythorne E, Rohm M, van de Bunt M, Brereton MF, Tarasov AI, Blacker TS, et al.  
658 Diabetes causes marked inhibition of mitochondrial metabolism in pancreatic beta-cells. *Nature*  
659 *communications.* 2019;10(1):2474.
- 660 16. Anello M, Lupi R, Spampinato D, Piro S, Masini M, Boggi U, et al. Functional and  
661 morphological alterations of mitochondria in pancreatic beta cells from type 2 diabetic patients.  
662 *Diabetologia.* 2005;48(2):282-9.
- 663 17. Lu H, Koshkin V, Allister EM, Gyulkhandanyan AV, Wheeler MB. Molecular and  
664 metabolic evidence for mitochondrial defects associated with beta-cell dysfunction in a mouse  
665 model of type 2 diabetes. *Diabetes.* 2010;59(2):448-59.

- 666 18. Dlaskova A, Spacek T, Santorova J, Plecita-Hlavata L, Berkova Z, Saudek F, et al. 4Pi  
667 microscopy reveals an impaired three-dimensional mitochondrial network of pancreatic islet beta-  
668 cells, an experimental model of type-2 diabetes. *Biochim Biophys Acta*. 2010;1797(6-7):1327-41.
- 669 19. Hennings TG, Chopra DG, DeLeon ER, VanDeusen HR, Sesaki H, Merrins MJ, et al. In  
670 vivo Deletion of Beta Cell Drp1 Impairs Insulin Secretion without Affecting Islet Oxygen  
671 Consumption. *Endocrinology*. 2018.
- 672 20. Kabra UD, Pfuhlmann K, Migliorini A, Keipert S, Lamp D, Korsgren O, et al. Direct  
673 Substrate Delivery Into Mitochondrial Fission-Deficient Pancreatic Islets Rescues Insulin  
674 Secretion. *Diabetes*. 2017;66(5):1247-57.
- 675 21. Park KS, Wiederkehr A, Kirkpatrick C, Mattenberger Y, Martinou JC, Marchetti P, et al.  
676 Selective actions of mitochondrial fission/fusion genes on metabolism-secretion coupling in  
677 insulin-releasing cells. *J Biol Chem*. 2008;283(48):33347-56.
- 678 22. Nikolaisen J, Nilsson LI, Pettersen IK, Willems PH, Lorens JB, Koopman WJ, et al.  
679 Automated quantification and integrative analysis of 2D and 3D mitochondrial shape and network  
680 properties. *PLoS One*. 2014;9(7):e101365.
- 681 23. Song W, Bossy B, Martin OJ, Hicks A, Lubitz S, Knott AB, et al. Assessing mitochondrial  
682 morphology and dynamics using fluorescence wide-field microscopy and 3D image processing.  
683 *Methods*. 2008;46(4):295-303.
- 684 24. Plecita-Hlavata L, Lessard M, Santorova J, Bewersdorf J, Jezek P. Mitochondrial oxidative  
685 phosphorylation and energetic status are reflected by morphology of mitochondrial network in  
686 INS-1E and HEP-G2 cells viewed by 4Pi microscopy. *Biochim Biophys Acta*. 2008;1777(7-  
687 8):834-46.
- 688 25. Schindelin J, Arganda-Carreras I, Frise E, Kaynig V, Longair M, Pietzsch T, et al. Fiji: an  
689 open-source platform for biological-image analysis. *Nat Methods*. 2012;9(7):676-82.
- 690 26. Schneider CA, Rasband WS, Eliceiri KW. NIH Image to ImageJ: 25 years of image  
691 analysis. *Nat Methods*. 2012;9(7):671-5.
- 692 27. Liu X, Yang L, Long Q, Weaver D, Hajnoczky G. Choosing proper fluorescent dyes,  
693 proteins, and imaging techniques to study mitochondrial dynamics in mammalian cells. *Biophys*  
694 *Rep*. 2017;3(4):64-72.
- 695 28. Chaudhry A. Mitochondria Analyzer 2019 [Available from:  
696 <https://github.com/AhsenChaudhry/Mitochondria-Analyzer>]
- 697 29. Hartig SM. Basic image analysis and manipulation in ImageJ. *Curr Protoc Mol Biol*.  
698 2013;Chapter 14:Unit14 5.
- 699 30. Tseng Q. AdaptiveThreshold - ImageJ Plugin. [Available from:  
700 <https://sites.google.com/site/qingzongtseng/adaptivethreshold#use>]

- 701 31. Landini G, ImageJ. Auto Local Threshold. [Available from:  
702 [https://imagej.net/Auto\\_Local\\_Threshold](https://imagej.net/Auto_Local_Threshold)]
- 703 32. Anchang B, Hart TD, Bendall SC, Qiu P, Bjornson Z, Linderman M, et al. Visualization  
704 and cellular hierarchy inference of single-cell data using SPADE. *Nat Protoc.* 2016;11(7):1264-  
705 79.
- 706 33. Qiu P, Simonds EF, Bendall SC, Gibbs KD, Jr., Bruggner RV, Linderman MD, et al.  
707 Extracting a cellular hierarchy from high-dimensional cytometry data with SPADE. *Nature*  
708 *biotechnology.* 2011;29(10):886-91.
- 709 34. Berman SB, Chen YB, Qi B, McCaffery JM, Rucker EB, 3rd, Goebbels S, et al. Bcl-x L  
710 increases mitochondrial fission, fusion, and biomass in neurons. *J Cell Biol.* 2009;184(5):707-19.
- 711 35. Fouquet C, Gilles JF, Heck N, Dos Santos M, Schwartzmann R, Cannaya V, et al.  
712 Improving axial resolution in confocal microscopy with new high refractive index mounting  
713 media. *PLoS One.* 2015;10(3):e0121096.
- 714 36. Cole RW, Jinadasa T, Brown CM. Measuring and interpreting point spread functions to  
715 determine confocal microscope resolution and ensure quality control. *Nat Protoc.*  
716 2011;6(12):1929-41.
- 717 37. Pawley J. Points, Pixels, and Gray Levels: Digitizing Imaging Data. *Handbook of*  
718 *Biological Confocal Microscopy*2006. p. 59-80.
- 719 38. Imaging SV. Microscopy Nyquist rate and PSF calculator. [Available from:  
720 <https://svi.nl/NyquistCalculator>]
- 721 39. Sage D, Donati L, Soulez F, Fortun D, Schmit G, Seitz A, et al. DeconvolutionLab2: An  
722 open-source software for deconvolution microscopy. *Methods.* 2017;115:28-41.
- 723 40. Wikstrom JD, Katzman SM, Mohamed H, Twig G, Graf SA, Heart E, et al. beta-Cell  
724 mitochondria exhibit membrane potential heterogeneity that can be altered by stimulatory or toxic  
725 fuel levels. *Diabetes.* 2007;56(10):2569-78.
- 726 41. Sun MG, Williams J, Munoz-Pinedo C, Perkins GA, Brown JM, Ellisman MH, et al.  
727 Correlated three-dimensional light and electron microscopy reveals transformation of  
728 mitochondria during apoptosis. *Nat Cell Biol.* 2007;9(9):1057-65.
- 729 42. Jakobs S. High resolution imaging of live mitochondria. *Biochim Biophys Acta.*  
730 2006;1763(5-6):561-75.
- 731 43. Zahedi A, On V, Phandthong R, Chaili A, Remark G, Bhanu B, et al. Deep Analysis of  
732 Mitochondria and Cell Health Using Machine Learning. *Sci Rep.* 2018;8(1):16354.
- 733 44. Leonard AP, Cameron RB, Speiser JL, Wolf BJ, Peterson YK, Schnellmann RG, et al.  
734 Quantitative analysis of mitochondrial morphology and membrane potential in living cells using



- 735 high-content imaging, machine learning, and morphological binning. *Biochim Biophys Acta*.  
736 2015;1853(2):348-60.
- 737 45. Thivolet C, Vial G, Cassel R, Rieusset J, Madec AM. Reduction of endoplasmic reticulum-  
738 mitochondria interactions in beta cells from patients with type 2 diabetes. *PLoS One*.  
739 2017;12(7):e0182027.
- 740 46. Valm AM, Cohen S, Legant WR, Melunis J, Hershberg U, Wait E, et al. Applying systems-  
741 level spectral imaging and analysis to reveal the organelle interactome. *Nature*.  
742 2017;546(7656):162-7.
- 743 47. Han Y, Li M, Qiu F, Zhang M, Zhang YH. Cell-permeable organic fluorescent probes for  
744 live-cell long-term super-resolution imaging reveal lysosome-mitochondrion interactions. *Nature*  
745 *communications*. 2017;8(1):1307.
- 746 48. Sandebring A, Thomas KJ, Beilina A, van der Brug M, Cleland MM, Ahmad R, et al.  
747 Mitochondrial alterations in PINK1 deficient cells are influenced by calcineurin-dependent  
748 dephosphorylation of dynamin-related protein 1. *PLoS One*. 2009;4(5):e5701.
- 749 49. Aharoni-Simon M, Shumiatcher R, Yeung A, Shih AZ, Dolinsky VW, Doucette CA, et al.  
750 Bcl-2 Regulates Reactive Oxygen Species Signaling and a Redox-Sensitive Mitochondrial Proton  
751 Leak in Mouse Pancreatic beta-Cells. *Endocrinology*. 2016;157(6):2270-81.
- 752 50. Luciani DS, Ao P, Hu X, Warnock GL, Johnson JD. Voltage-gated Ca(2+) influx and  
753 insulin secretion in human and mouse beta-cells are impaired by the mitochondrial Na(+)/Ca(2+)  
754 exchange inhibitor CGP-37157. *Eur J Pharmacol*. 2007;576(1-3):18-25.
- 755 51. Kirshner H, Aguet F, Sage D, Unser M. 3-D PSF fitting for fluorescence microscopy:  
756 implementation and localization application. *J Microsc*. 2013;249(1):13-25.
- 757 52. Dey N, Blanc-Feraud L, Zimmer C, Roux P, Kam Z, Olivo-Marin JC, et al. Richardson-  
758 Lucy algorithm with total variation regularization for 3D confocal microscope deconvolution.  
759 *Microscopy research and technique*. 2006;69(4):260-6.
- 760 53. Ollion J, Cochenec J, Loll F, Escude C, Boudier T. TANGO: a generic tool for high-  
761 throughput 3D image analysis for studying nuclear organization. *Bioinformatics*.  
762 2013;29(14):1840-1.
- 763 54. Legland D, Arganda-Carreras I, Andrey P. MorphoLibJ: integrated library and plugins for  
764 mathematical morphology with ImageJ. *Bioinformatics*. 2016;32(22):3532-4.

## Chaudhry et al. – Figure 1

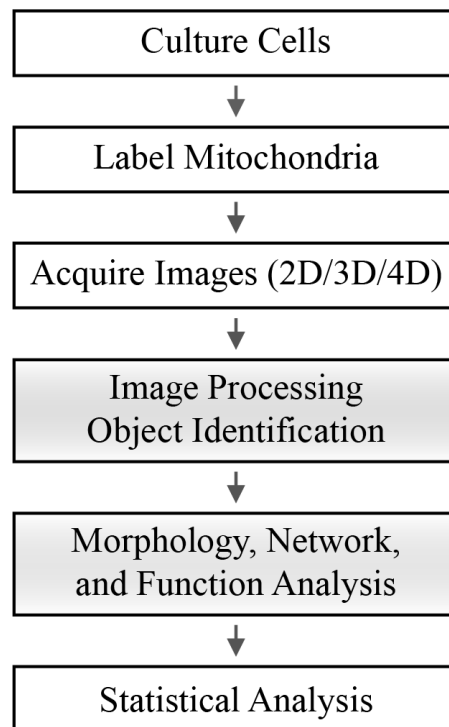

**Figure 1: Schematic of the general workflow required for mitochondrial analysis by confocal microscopy.** The shaded boxes represent the steps that are addressed and detailed in this paper.

## Chaudhry et al. – Figure 2

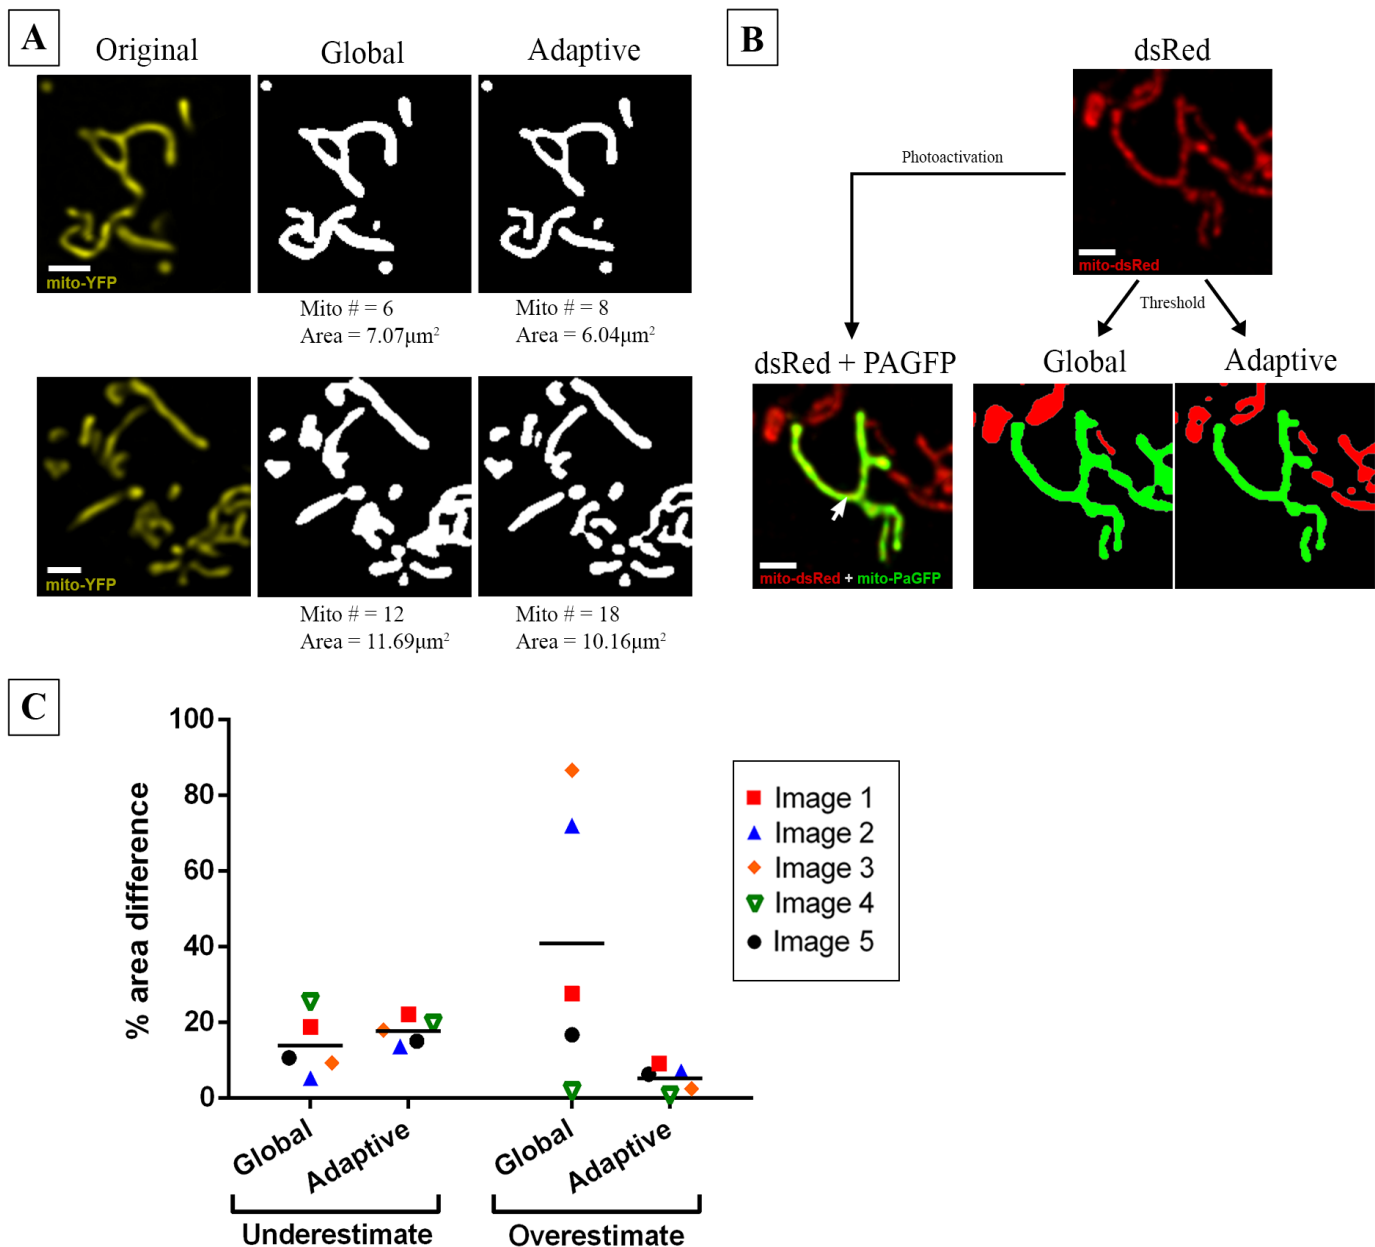

**Figure 2: Comparison of mitochondrial identification using Global vs Adaptive thresholding methods.** (A) Two representative examples of object identification using Global thresholding ('Default' method) vs Adaptive thresholding (radius = 1.25  $\mu\text{m}$ , C = 11) on images of MIN6-cell mitochondria labelled with Mito-YFP. The number of identified objects (mitochondria) and their total area are indicated below the images. Scale bar = 1  $\mu\text{m}$ . (B) Part of the mitochondrial network in a MIN6 cell co-transfected with mito-dsRed and mito-PAGFP. *Top* - All mitochondria imaged in the mito-dsRed channel. *Bottom left* - A single mitochondrion (green) was labeled by laser-based mito-PAGFP activation at the point indicated by the arrow. *Bottom right* - Object identification using Global vs Adaptive threshold algorithms applied to the dsRed channel; in each image, the object that is identified as contiguous with the PAGFP-labelled mitochondrion is shown in green. Comparison with the original image shows that the Adaptive method more accurately distinguished the photo-labeled mitochondrion, whereas Global thresholding artificially merged it with adjacent mitochondria. Scale bar = 1  $\mu\text{m}$ . (C) Quantitative comparison of the degree to which Global and Adaptive thresholding under- or over-estimated the PAGFP-labeled mitochondrion in 5 test images. The corresponding images and details of the estimation algorithm are shown in Figure S3.

### Chaudhry et al. – Figure 3

| A            | Morphology                                                          |  |              |                                                                              |
|--------------|---------------------------------------------------------------------|--|--------------|------------------------------------------------------------------------------|
|              | 2D                                                                  |  | 3D           |                                                                              |
| Area         | <i>Number of pixels.</i>                                            |  | Volume       | <i>Number of voxels.</i>                                                     |
| Perimeter    | <i>Boundary pixel count</i>                                         |  | Surface Area | <i>Estimate of area on surface.</i>                                          |
| Form Factor  | $\frac{p^2}{4\pi A}$ <i>1 (round),</i><br><i>↑ with elongation.</i> |  | Sphericity   | $36\pi \frac{V^2}{S^3}$ <i>0 (non-spherical)</i><br><i>to 1 (spherical).</i> |
| Aspect Ratio | $AR = \frac{d_{max}}{d_{min}}$ <i>0 (round) to 1 (elongated).</i>   |  |              |                                                                              |

  

| B | Network / Connectivity |                  |  |
|---|------------------------|------------------|--|
|   |                        | Branch Number    |  |
|   |                        | Branch Junctions |  |
|   |                        | Branch Length    |  |

  

|                                                                                     |                                                                                     |                                                                                     |
|-------------------------------------------------------------------------------------|-------------------------------------------------------------------------------------|-------------------------------------------------------------------------------------|
|  |  |  |
| 1                                                                                   | 1                                                                                   | 5                                                                                   |
| -                                                                                   | -                                                                                   | 2                                                                                   |
| 1 Branch                                                                            | 1 Branch                                                                            | 5 Branches                                                                          |
| 0 Branch Junctions                                                                  | 0 Branch Junctions                                                                  | 2 Branch Junctions                                                                  |
| ↓ Mean Branch Length                                                                | ↑↑ Mean Branch Length                                                               | ↑ Mean Branch Length                                                                |
| ↓ Total Branch Length                                                               | ↑ Total Branch Length                                                               | ↑↑ Total Branch Length                                                              |

**Figure 3: Summary of morphological and network descriptors used in 2D/3D analysis of mitochondria.** (A) Summary and definitions of the mathematical descriptors used to quantify mitochondrial morphology in two and three dimensions. (B) Summary of parameters used to describe mitochondrial network connectivity and illustration of skeletonization analysis on: a punctate object with no branch junctions and minimal branch length (*Left*); a long single tubular object with no branch junctions but higher branch length (*Middle*); and a complex object with multiple branches and junctions (gray dots), and the highest total branch length (*Right*). Note that the mean branch length, derived by dividing the total branch length by number of branches, is greater in the object in the middle than the more complex object on the right.

## Chaudhry et al. – Figure 4

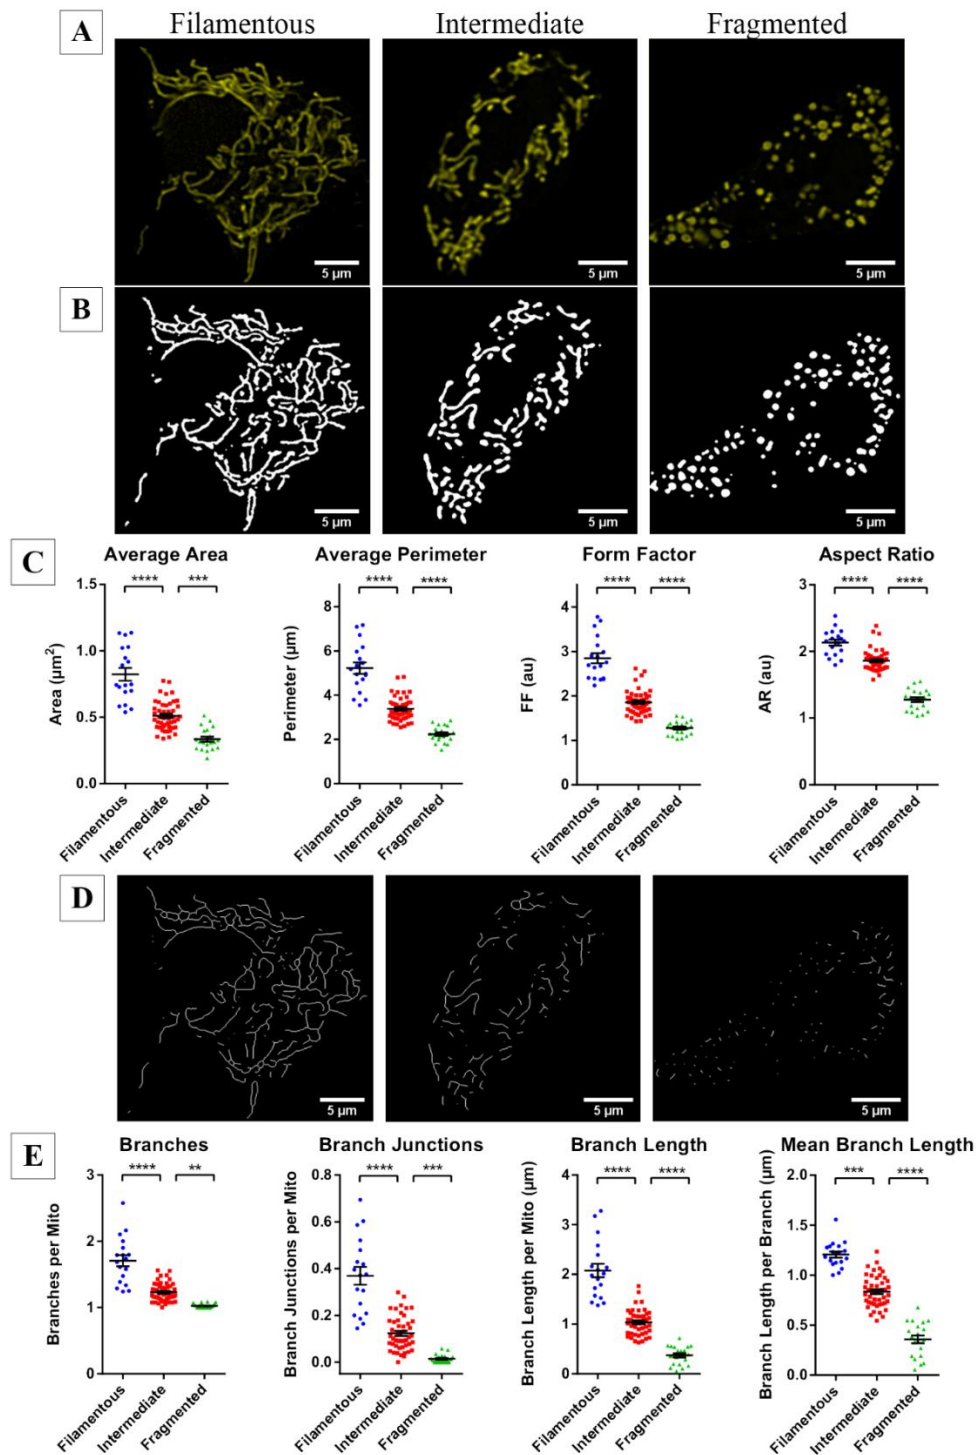

**Figure 4: Quantitative comparison of mitochondrial morphology and network connectivity in 2D.** Based on visual inspection of their mitochondria, 84 images of Mito-YFP-expressing MIN6 cells were categorized into three morphological groups: fragmented (20 cells), intermediate (46 cells), or filamentous (18 cells). **(A)** Examples of the YFP-labeled mitochondria in representative cells from each group, and **(B)** the objects identified by application of adaptive thresholding to the images. **(C)** The 2D morphological analysis of all cells in each of the categories. **(D)** Skeletonization of the mitochondrial objects identified in panel B. **(E)** Quantitative analysis and comparison of mitochondrial network connectivity performed on all cells in each morphological category. Data are represented by mean  $\pm$  SEM. One-way ANOVA with Sidak post-hoc test was used to compare the groups; \*\*\* $p < 0.001$ , \*\*\*\* $p < 0.0001$ .

Chaudhry et al. – Figure 5

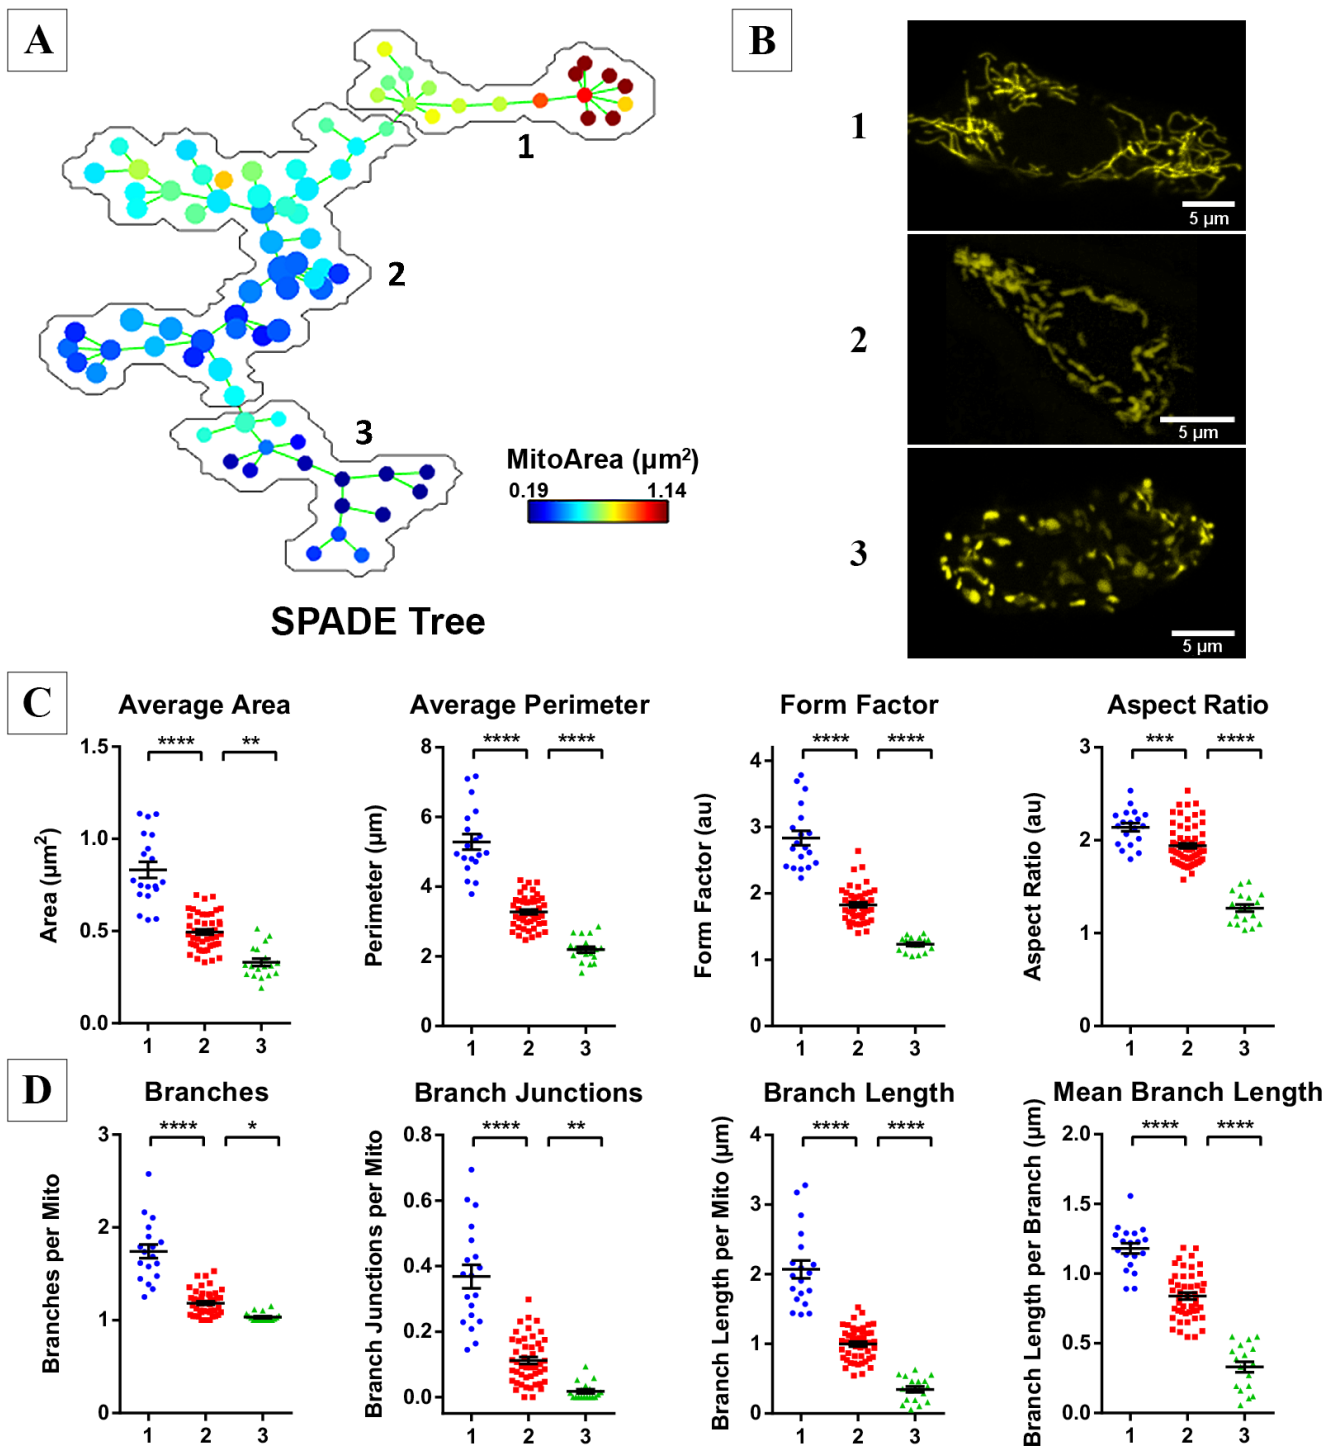

**Figure 5: Unsupervised categorization of mitochondrial features using Spanning-tree Progression Analysis of Density-normalized Events (SPADE).** (A) A SPADE tree was generated based on the same set of 84 images used in Figure 4, and then automatically subdivided into 3 groups; Group 1 contains 19 nodes/cells, Group 2 contains 47 nodes/cells, and Group 3 contains 18 nodes/cells. (B) Representative images extracted from each of the three SPADE-generated groups. (C, D) Comparison of the mitochondrial morphology and network parameters between the 3 SPADE-identified cell groups. All data are represented by mean  $\pm$  SEM. \* $p < 0.05$ , \*\* $p < 0.01$ , \*\*\* $p < 0.001$ , \*\*\*\* $p < 0.0001$  as determined by one-way ANOVA with Sidak post-hoc test;  $n = 84$  images.

## Chaudhry et al. – Figure 6

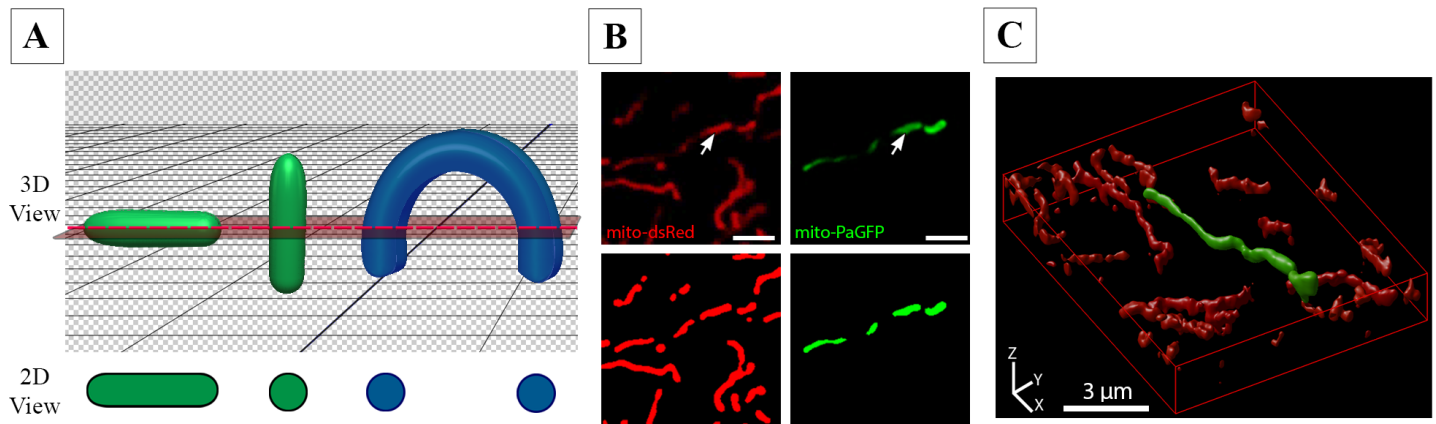

**Figure 6: Limitations of 2D morphometric analysis.** (A) Schematic illustrating the effect of object orientation in 3D space on the image capture in a horizontal 2D slice. The apparent 2D morphology of the same tubular object (shown in green) will depend on its orientation relative to the confocal plane. If a curved object (shown in blue) intersects the confocal plane at several locations, it will erroneously be identified as separate objects. (B) MIN6 cells were co-transfected with Mito-dsRed and Mito-PAGFP and photoactivation induced at the point indicated by an arrowhead. Scale bars = 3  $\mu\text{m}$ . *Top row* – 2D image of Mito-dsRed and mito-PAGFP channels after photoactivation. *Bottom row* – objects identified after pre-processing and thresholding of the 2D cross-section. (C) Full 3D imaging and reconstruction (rendered using Huygens Professional software) of the same mitochondrial population shown in panel B. Note that the photo-labelled mitochondrion in 2D appears as a series of separate mitochondria, whereas 3D visualization correctly identifies it as one contiguous organelle.

## Chaudhry et al. – Figure 7

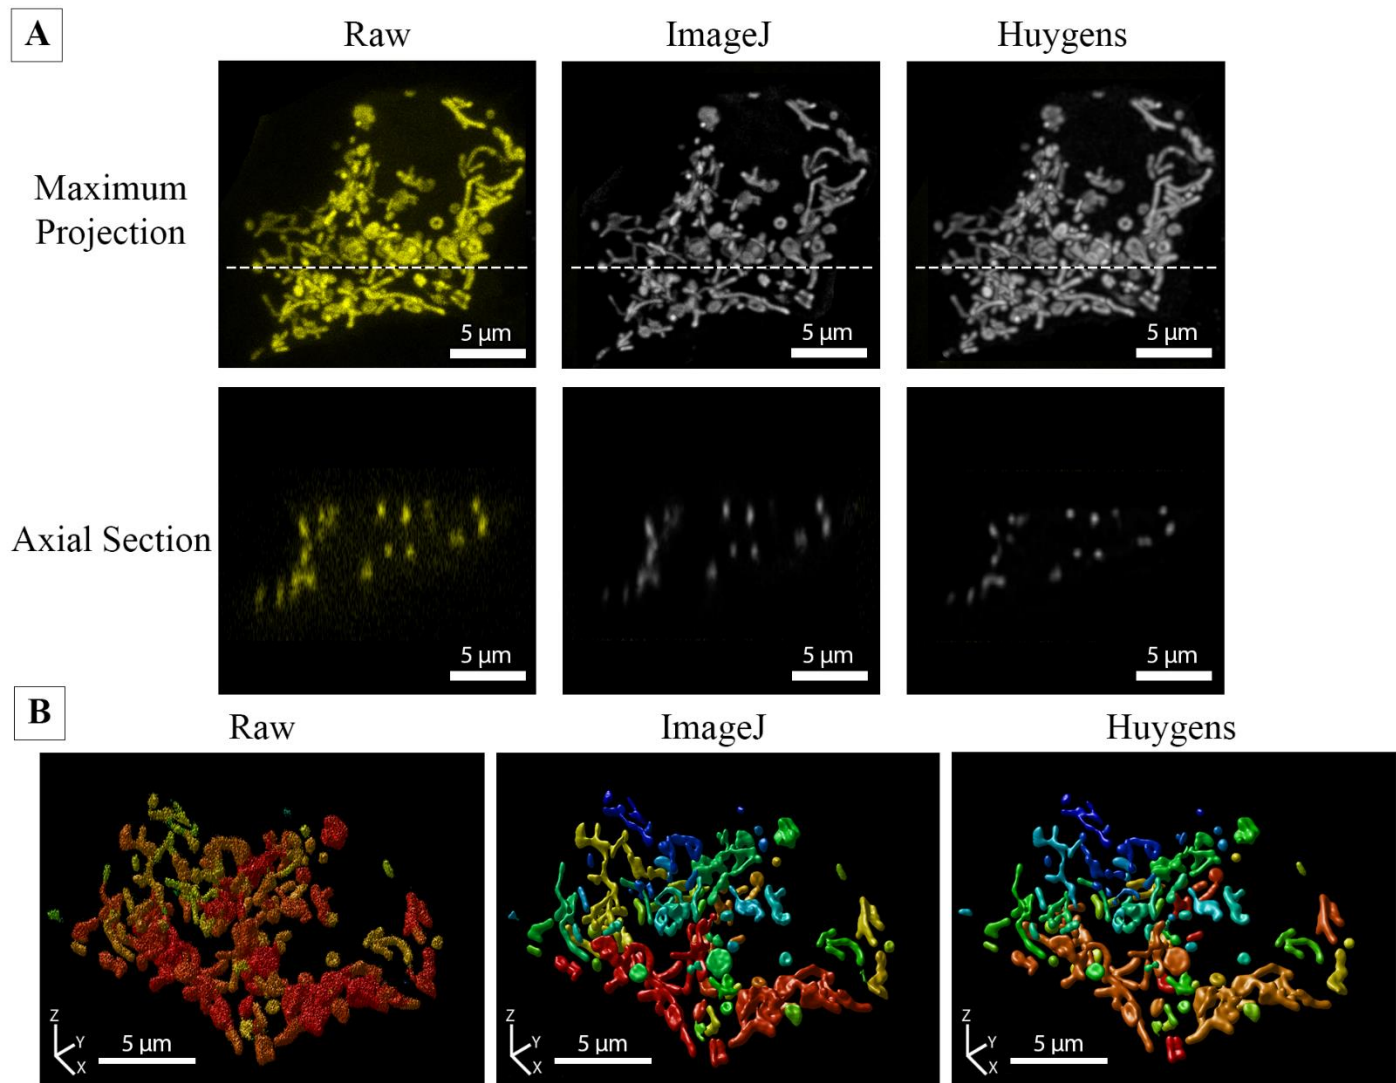

**Figure 7: Deconvolution improves the quality and accuracy of 3D mitochondrial analysis.** (A) A full z-stack was acquired from a Mito-YFP-expressing MIN6 cell that was 11  $\mu\text{m}$  in height. *Top Panel* – Maximum projection views of the z-stack before and after deconvolution. The confocal image stack was deconvolved using either ImageJ DeconvolutionLab (Richardson-Lucy algorithm) or Huygens Professional (Classical Maximum Likelihood Estimation) software for 40 iterations. The dotted line indicates the position of the axial section shown below. *Bottom Panel* – Axial sections ( $xz$ -plane) of the raw and deconvolved image stacks. The reduction in axial stretching of objects can be seen in the deconvolved stacks, with the best improvement achieved using the Huygens algorithm (see additional details in Figure S5 and Supplemental Table S1). (B) 3D renderings of the z-stack before and after deconvolution with ImageJ or Huygens Professional. All 3D visualizations were generated using the Huygens 3D object renderer, with a unique colour assigned to separate objects.



## Chaudhry et al. – Figure 8

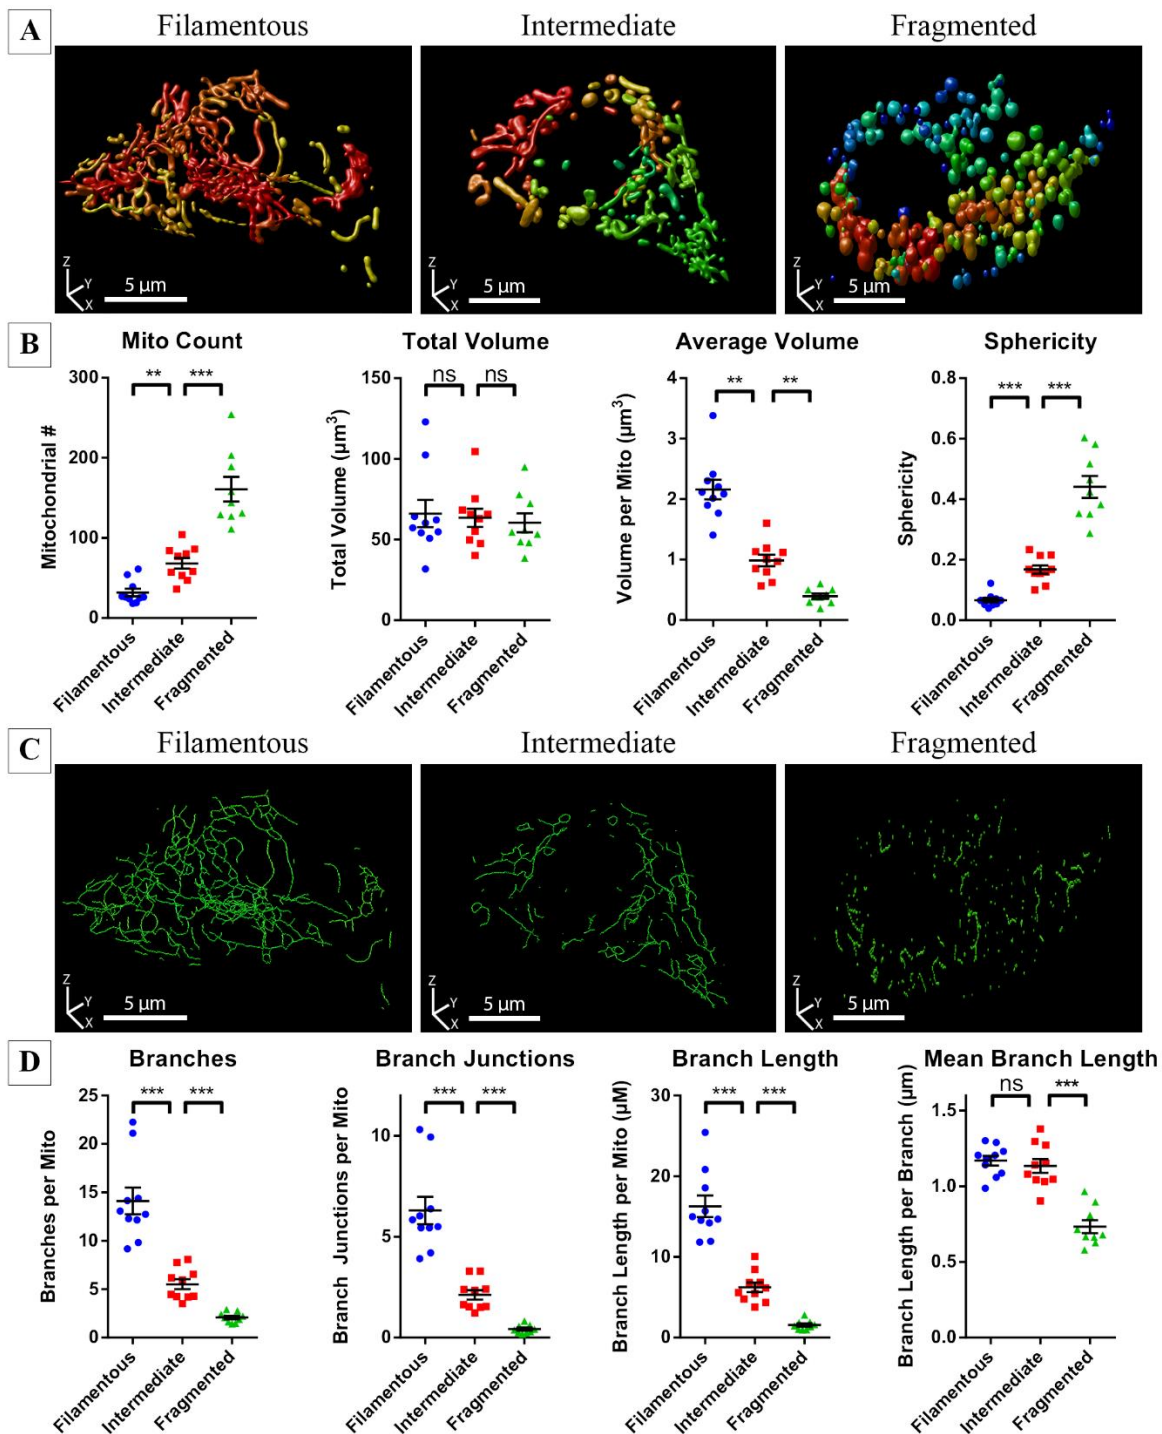

**Figure 8: Quantitative comparison of mitochondrial morphology and network connectivity in 3D.** Image stacks of Mito-YFP-expressing MIN6 cells were visualized in 3D and their mitochondria manually categorized as fragmented, intermediate or filamentous. **(A)** 3D renderings (produced using Huygens Professional) of representative Mito-YFP-expressing MIN6 cells from each of the morphological categories. **(B)** Quantitative 3D analysis and comparison of mitochondrial morphology between cells in each category. **(C)** 3D renderings of the skeletonized mitochondrial network of the cells depicted in panel A. **(D)** Quantitative 3D analysis and comparison of mitochondrial network connectivity between cells in each category. All data are represented by mean  $\pm$  SEM. \* $p < 0.05$ , \*\* $p < 0.01$ , \*\*\* $p < 0.001$ , as determined by one-way ANOVA with Sidak post-hoc test.  $N = 10$  cells in each category.

## Chaudhry et al. – Figure 9

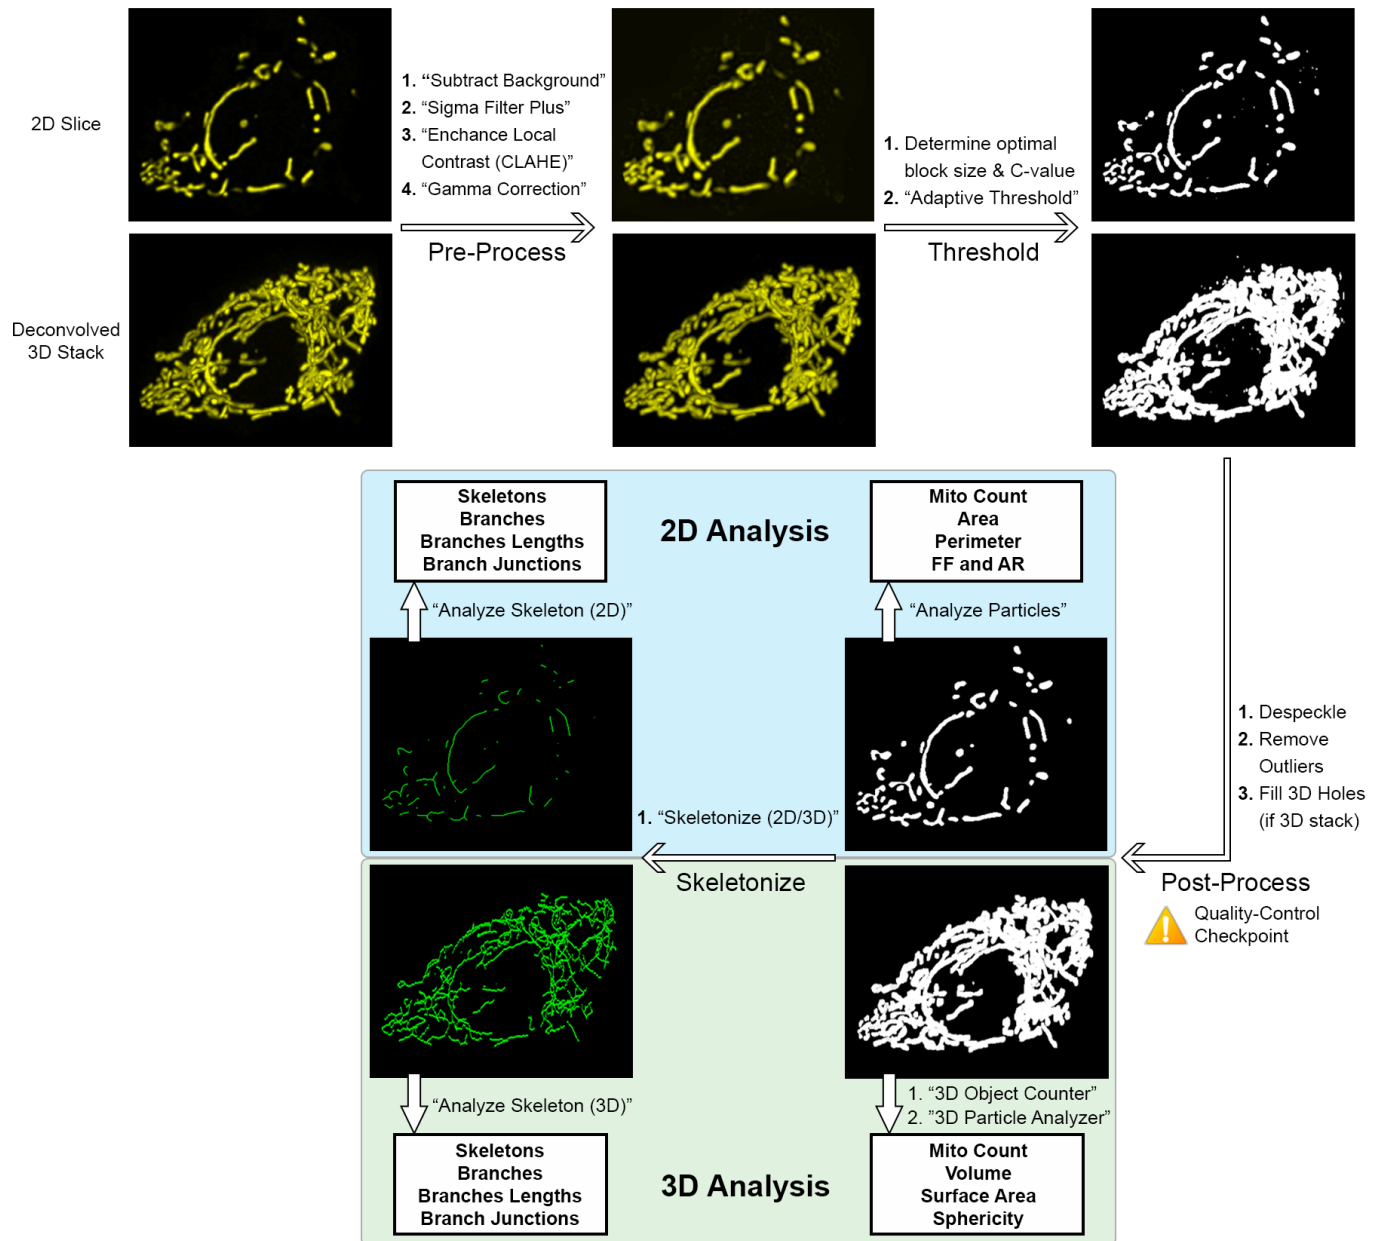

**Figure 9: Summary of pipeline for 2D and 3D mitochondrial analysis in ImageJ/Fiji.** For illustration, an image stack was acquired from a MIN6 cell expressing Mito-YFP; a representative slice is shown as the 2D input, and the entire stack (after deconvolution) as the 3D input. 3D Stacks are represented as maximum projections here. Scale bars = 5  $\mu$ m. See main text and Materials & Methods for additional details and parameter values.

## Chaudhry et al. – Figure 10

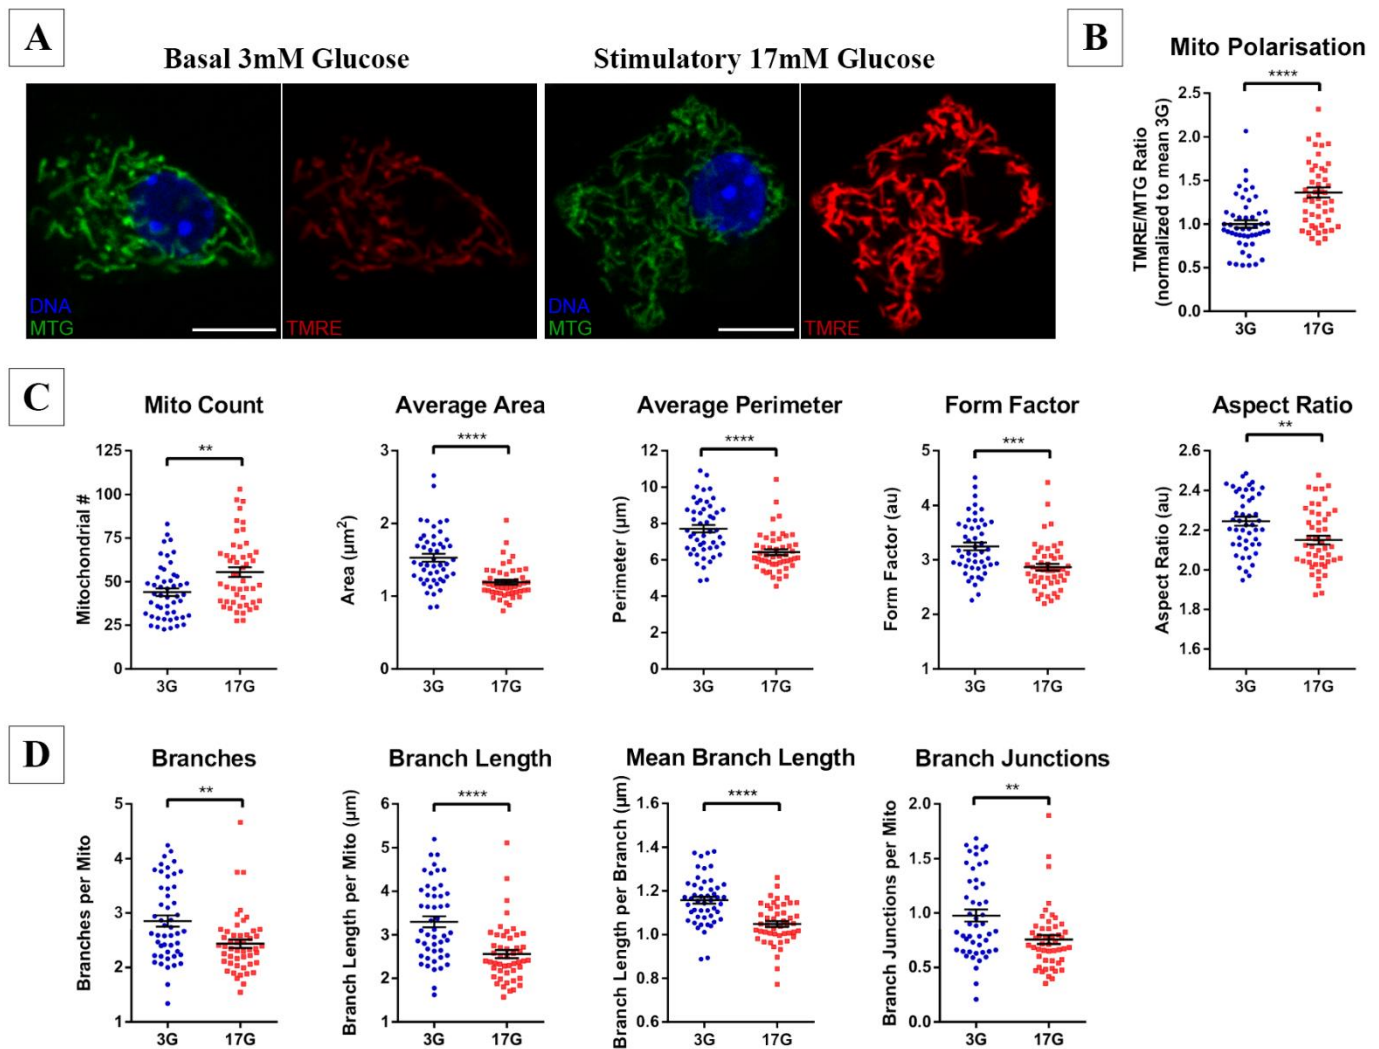

**Figure 10: Two-dimensional analysis shows that glucose stimulation is associated with mitochondrial fission in pancreatic islet cells.** Dispersed mouse islet cells were treated in either 3mM glucose (3G) or 17mM glucose (17G) for 60 minutes and then labeled with Hoescht 33342, MitoTracker Green FM (MTG), and TMRE before 2D imaging. **(A)** Representative images of a MTG and TMRE stained islet cell in 3G and 17G. **(B)** TMRE/MTG ratio (normalized to average 3G), indicating the degree of mitochondrial hyperpolarisation. Mitochondrial morphology and polarization were quantified using our 2D analysis pipeline in Fiji/ImageJ (see Materials and Methods). Comparison of mitochondrial morphometry **(C)**, and mitochondrial network connectivity **(D)** demonstrates significant differences between cells acutely treated with low and stimulatory glucose. All data are represented by mean  $\pm$  SEM. \*\* $p < 0.01$ , \*\*\* $p < 0.001$ , \*\*\*\* $p < 0.0001$  as determined by Student's t-test;  $n = 49$  cells in each glucose treatment from 4 mice.

## Chaudhry et al. – Figure 11

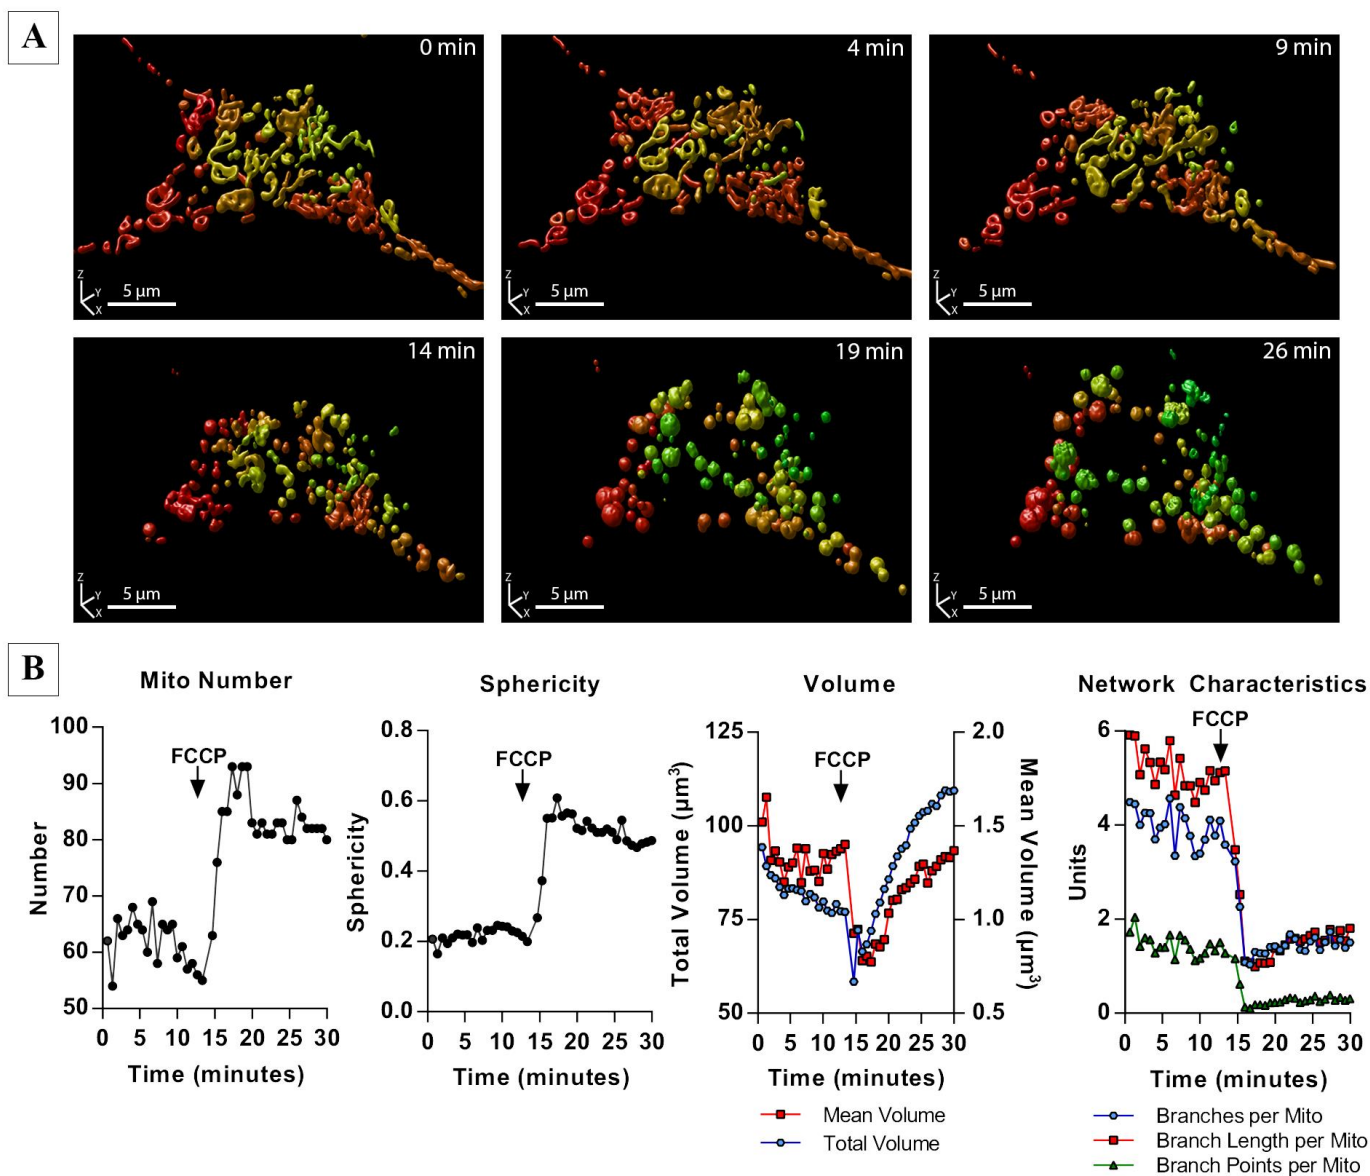

**Figure 11: Time-lapse 3D imaging ( $xyzt$ ) and analysis of mitochondrial dynamics.** Mito-YFP-expressing MIN6 cells were imaged in a stage-top incubator with one full image stack acquired every minute. **(A)** 3D renderings (produced in Huygens Professional) of the mitochondrial network in a single cell at different time-points. A high concentration FCCP ( $25 \mu\text{M}$ ) was added to the incubation media around the 13-minute mark. **(B)** Quantitative analysis of the time-dependent effects of FCCP on mitochondrial number, sphericity, total and mean volume, and network characteristics in the cell.
